# Supplementary material for: Synthesis of piperitone-derived halogenated lactones and their effect on aphid probing, feeding, and settling behavior
Source: Royal Society of Chemistry journal article supplement (doi:10.1039/c1ra00270h), 2011-01-01
Supplement: c1ra00270h.pdf [file c1ra00270h.pdf]

## Supplementary Information for publication

### Synthesis of piperitone-derived halogenated lactones and their effect on aphid probing, feeding, and settling behavior

Aleksandra Grudniewska,<sup>a</sup> Katarzyna Dancewicz,<sup>b</sup> Agata Białońska,<sup>c</sup> Zbigniew Ciunik,<sup>c</sup>  
Beata Gabryś<sup>b\*</sup> and Czesław Wawrzęczyk<sup>a\*</sup>

<sup>a</sup>Wrocław University of Environmental and Life Sciences, Department of Chemistry, Norwida 25, 50-375 Wrocław, Poland, [czeslaw.wawrzenczyk@up.wroc.pl](mailto:czeslaw.wawrzenczyk@up.wroc.pl)

<sup>b</sup>University of Zielona Góra, Department of Biology and Ecology, Szafrana 1, 65-516 Zielona Góra, Poland

<sup>c</sup>University of Wrocław, Faculty of Chemistry, 14 F. Joliot-Curie, 50-383 Wrocław, Poland

### List of contents

#### NMR spectra (<sup>1</sup>H NMR, COSY, <sup>13</sup>C NMR, HSQC)

|                                             |    |
|---------------------------------------------|----|
| NMR spectra of <b>2c</b> (Figs 1-4).....    | 2  |
| NMR spectra of <b>3c</b> (Figs 5-8).....    | 4  |
| NMR spectra of <b>4c</b> (Figs 9-12).....   | 6  |
| NMR spectra of <b>5c</b> (Figs 13-16).....  | 8  |
| NMR spectra of <b>7c</b> (Figs 17-20).....  | 10 |
| NMR spectra of <b>8c</b> (Figs 21-24).....  | 12 |
| NMR spectra of <b>9c</b> (Figs 25-28).....  | 14 |
| NMR spectra of <b>10c</b> (Figs 29-32)..... | 16 |
| NMR spectra of <b>11c</b> (Figs 33-36)..... | 18 |

#### Chiral Gas Chromatography chromatograms

|                                                     |    |
|-----------------------------------------------------|----|
| CGC chromatograms of <b>4a-c</b> (Figs 37-39).....  | 20 |
| CGC chromatograms of <b>5a-c</b> (Figs 40-42).....  | 21 |
| CGC chromatograms of <b>9a-c</b> (Figs 43-45).....  | 22 |
| CGC chromatograms of <b>10a-c</b> (Figs 46-48)..... | 23 |
| CGC chromatograms of <b>11a-c</b> (Figs 49-51)..... | 24 |

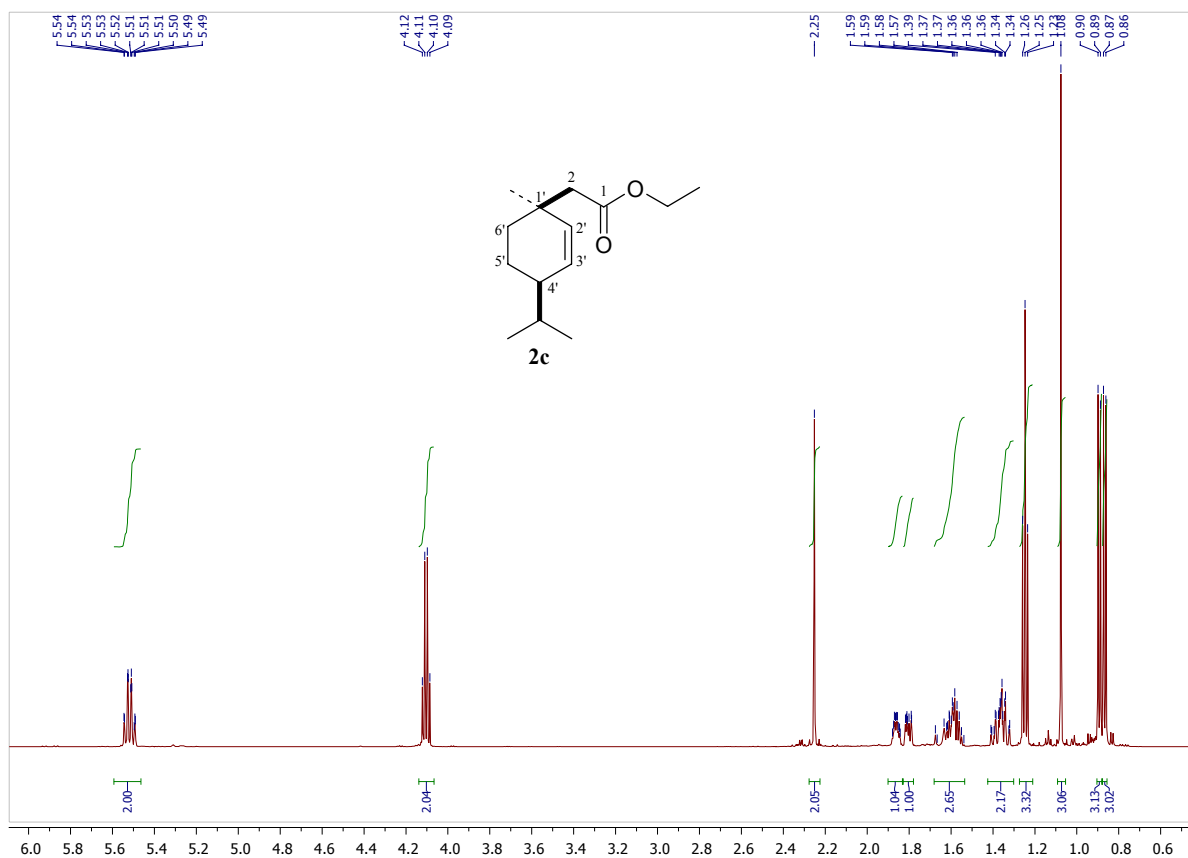

Fig. 1. <sup>1</sup>H NMR (CDCl<sub>3</sub>, 600 MHz) spectrum of **2c**.

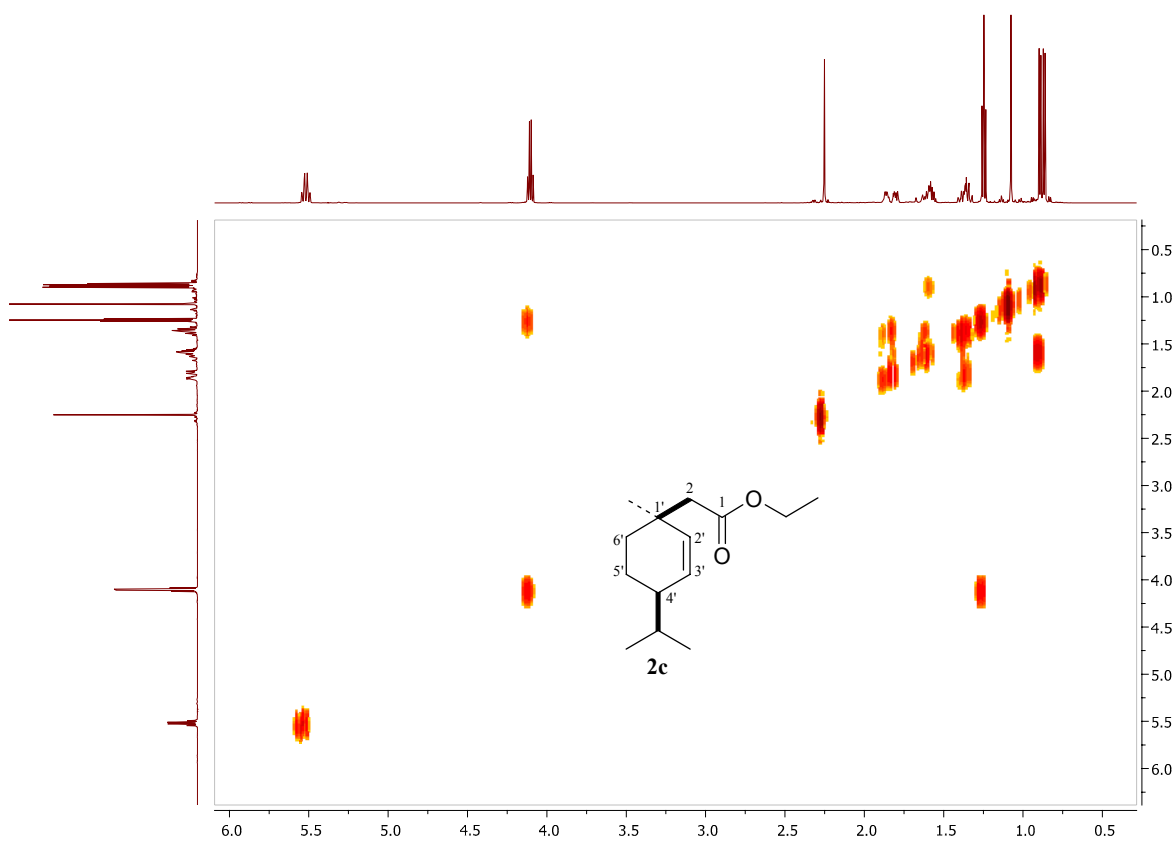

Fig. 2. COSY spectrum of **2c**.

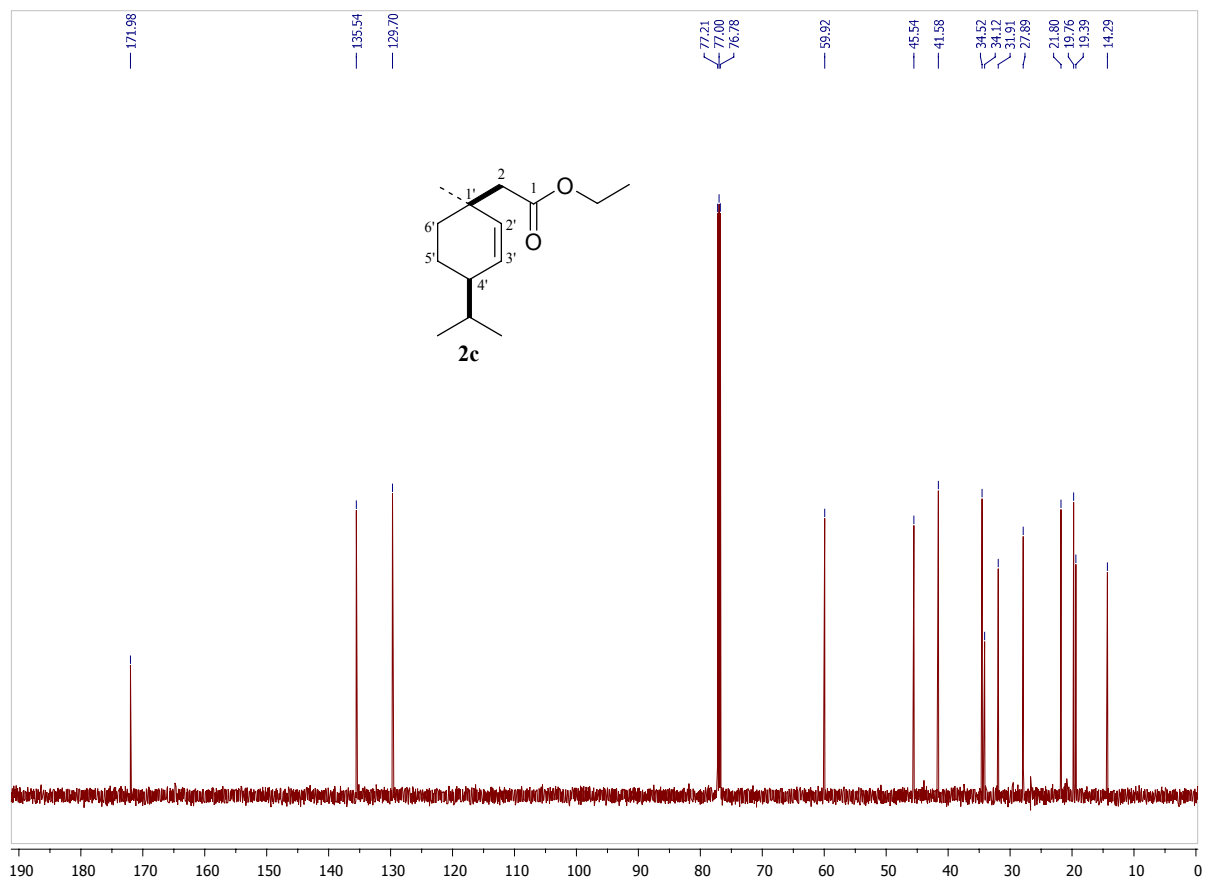

**Fig. 3.**  $^{13}\text{C}$  NMR ( $\text{CDCl}_3$ , 151 MHz) spectrum of **2c**.

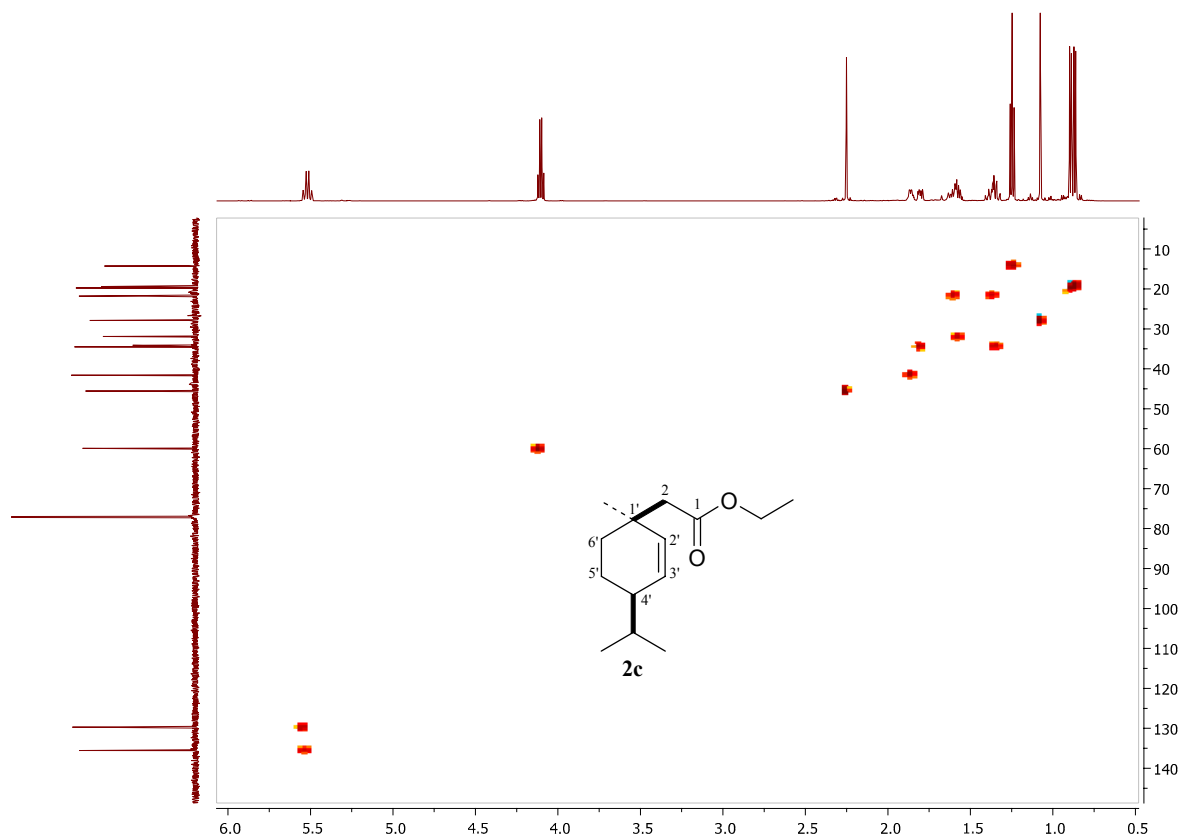

**Fig. 4.** HSQC spectrum of **2c**.

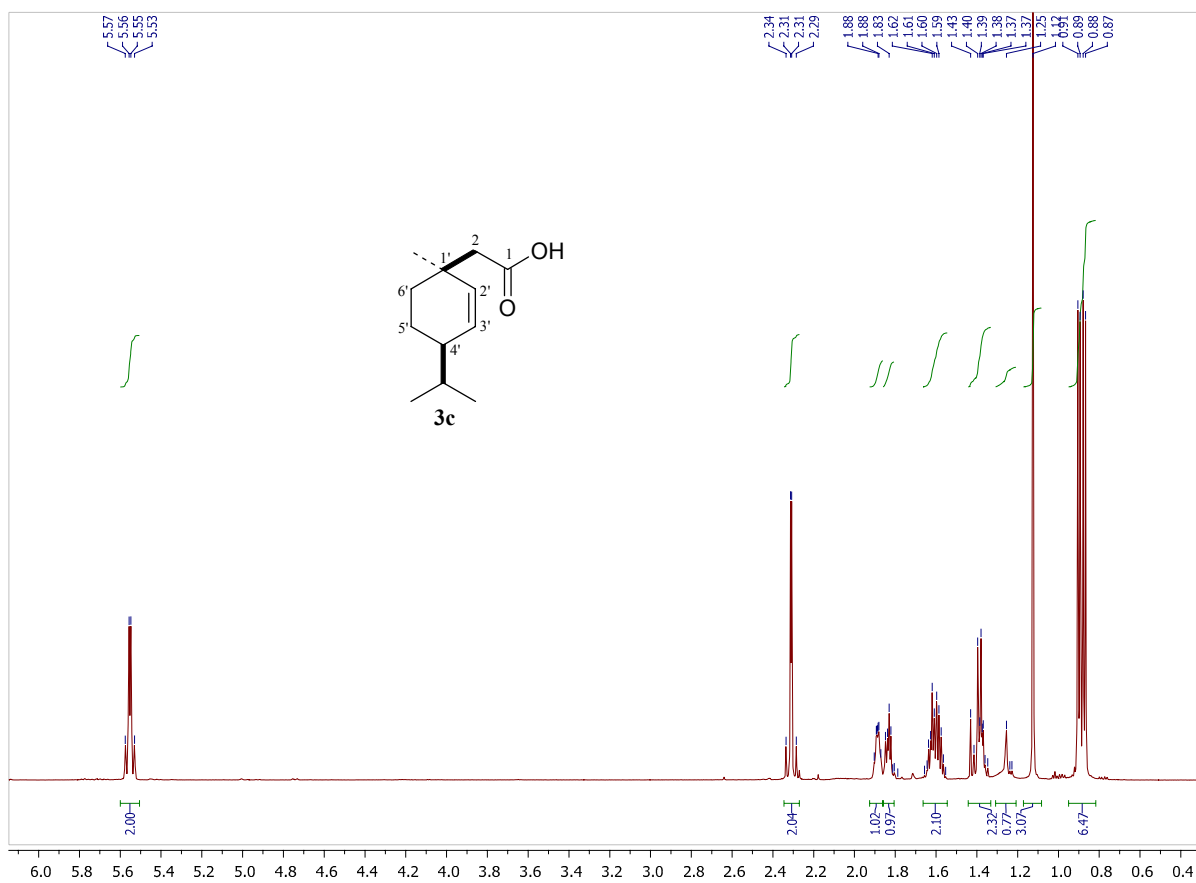

Fig. 5.  $^1\text{H}$  NMR ( $\text{CDCl}_3$ , 600 MHz) spectrum of **3c**.

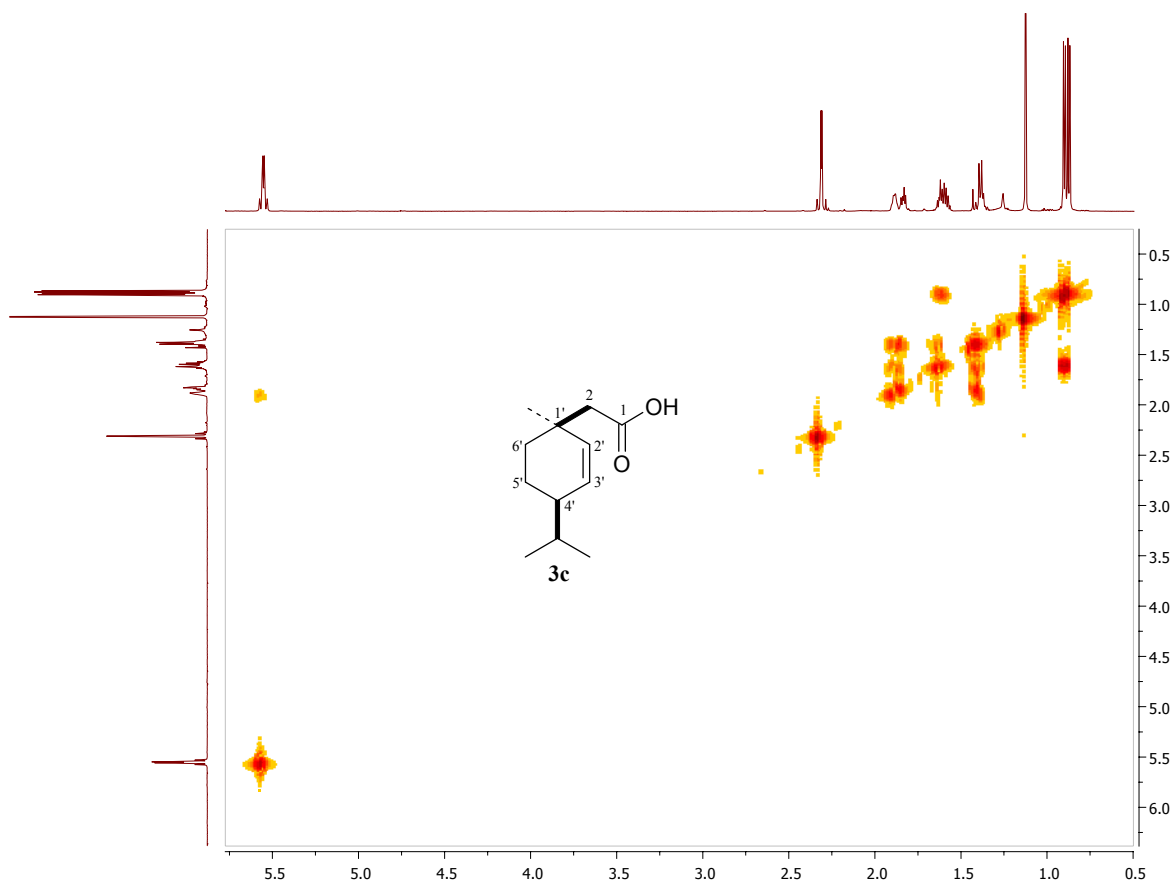

Fig. 6. COSY spectra of **3c**.

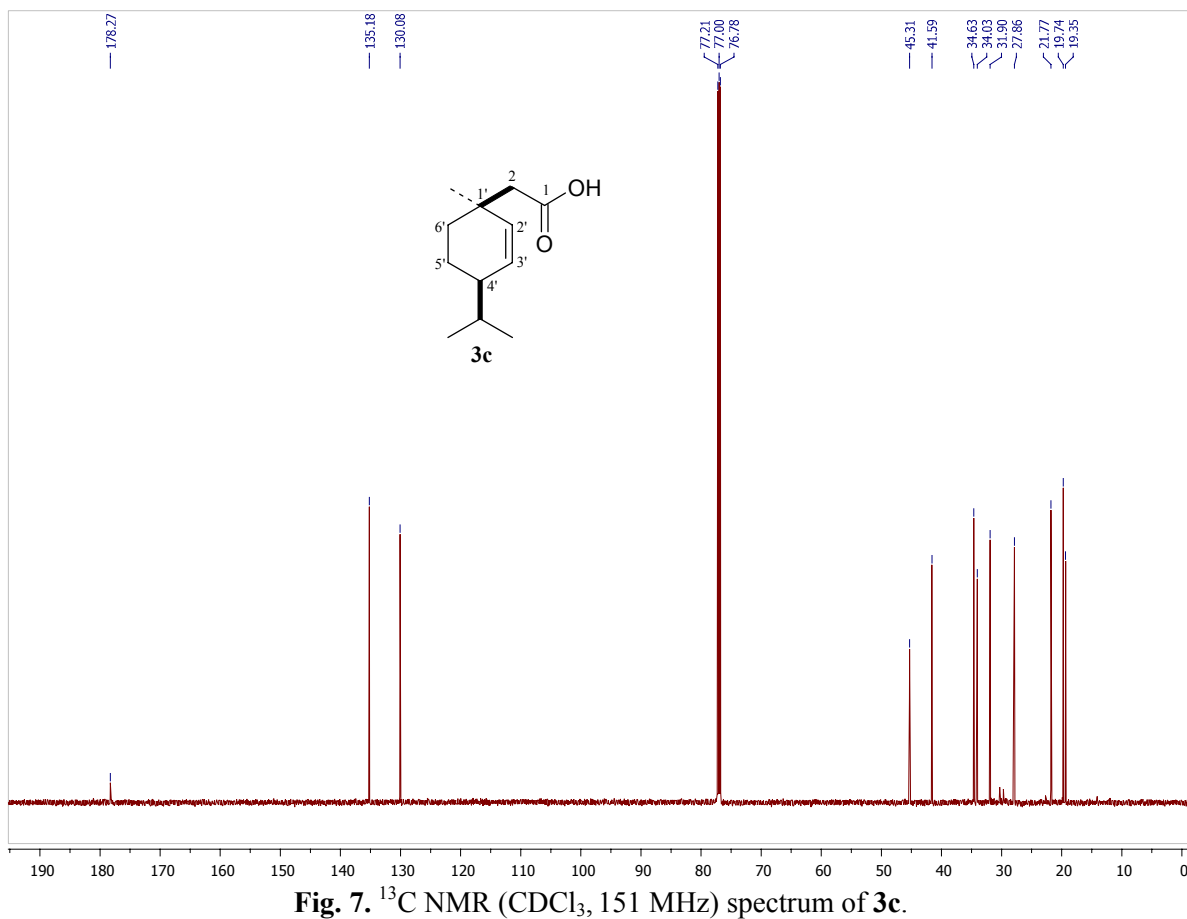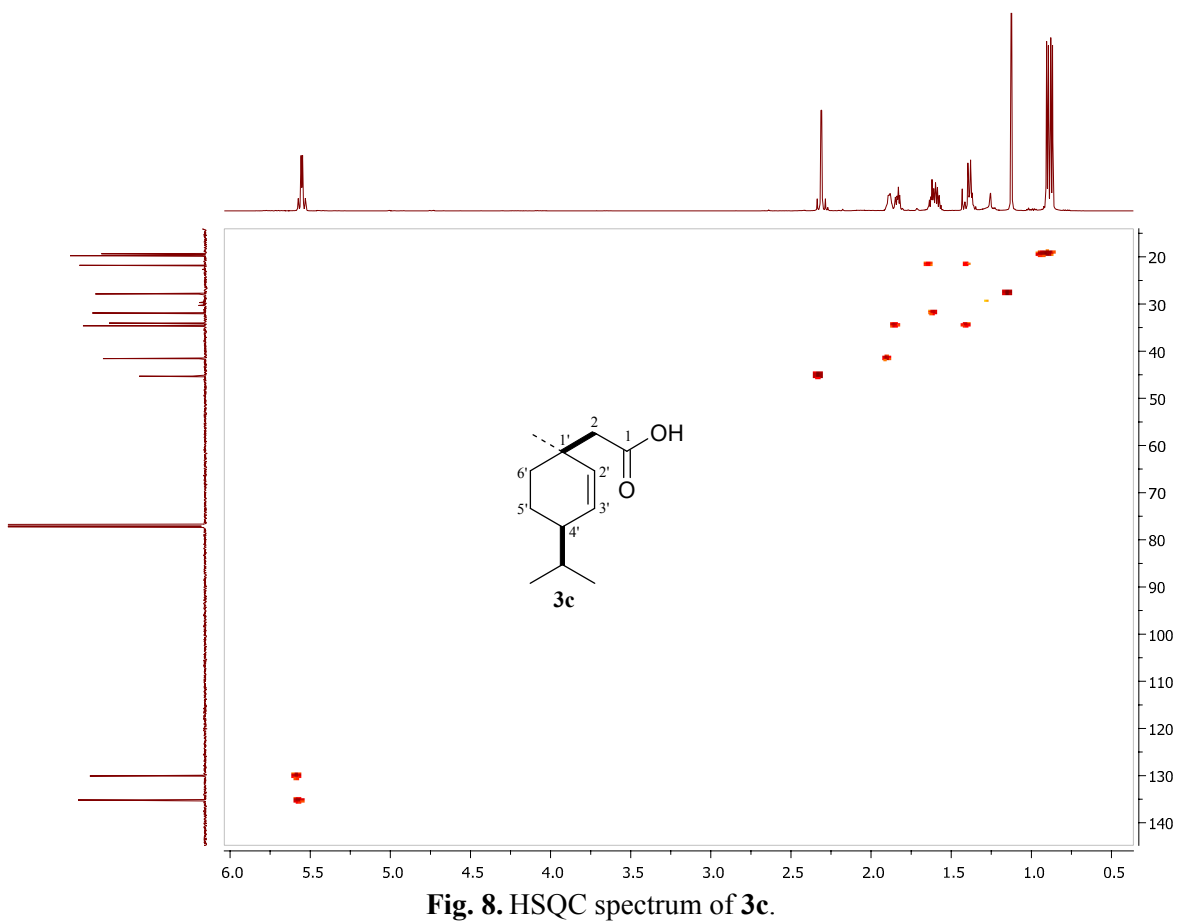

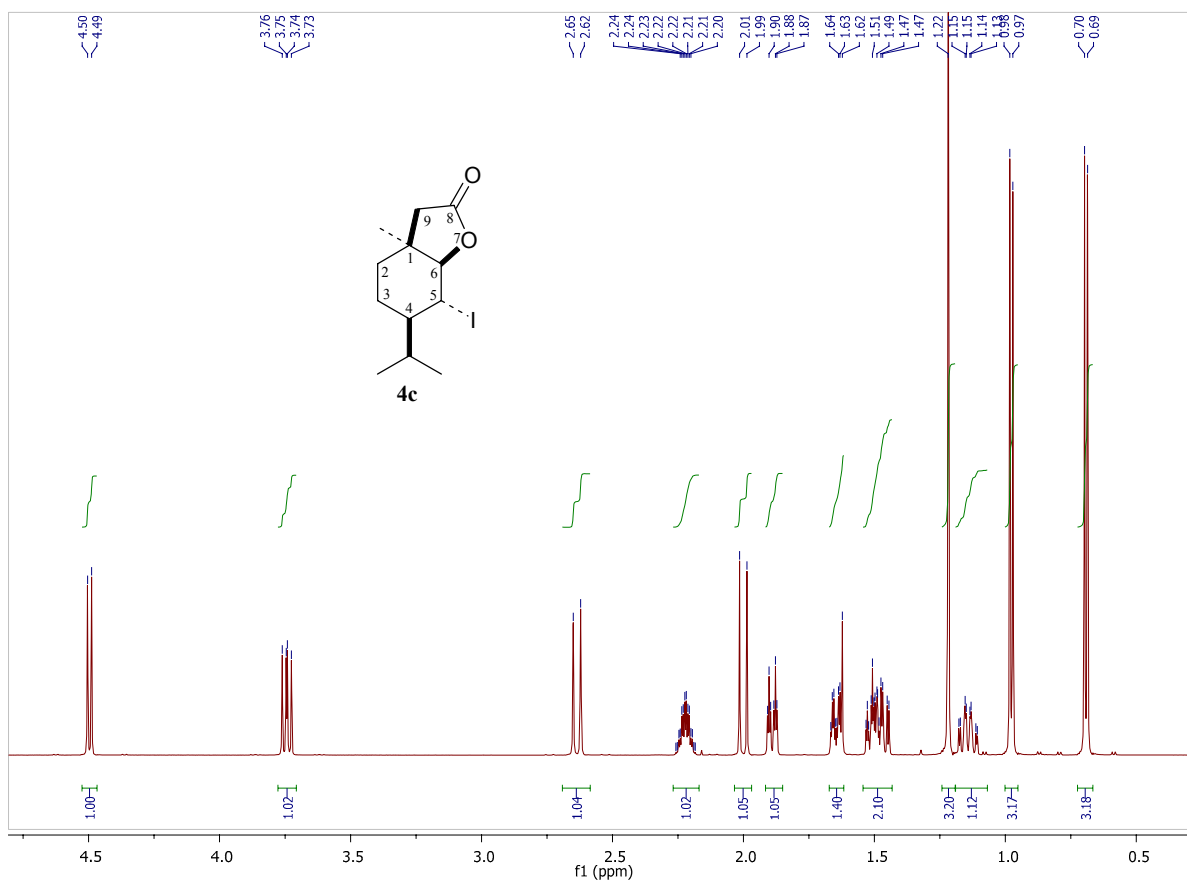

Fig. 9.  $^1\text{H}$  NMR ( $\text{CDCl}_3$ , 600 MHz) spectrum of **4c**.

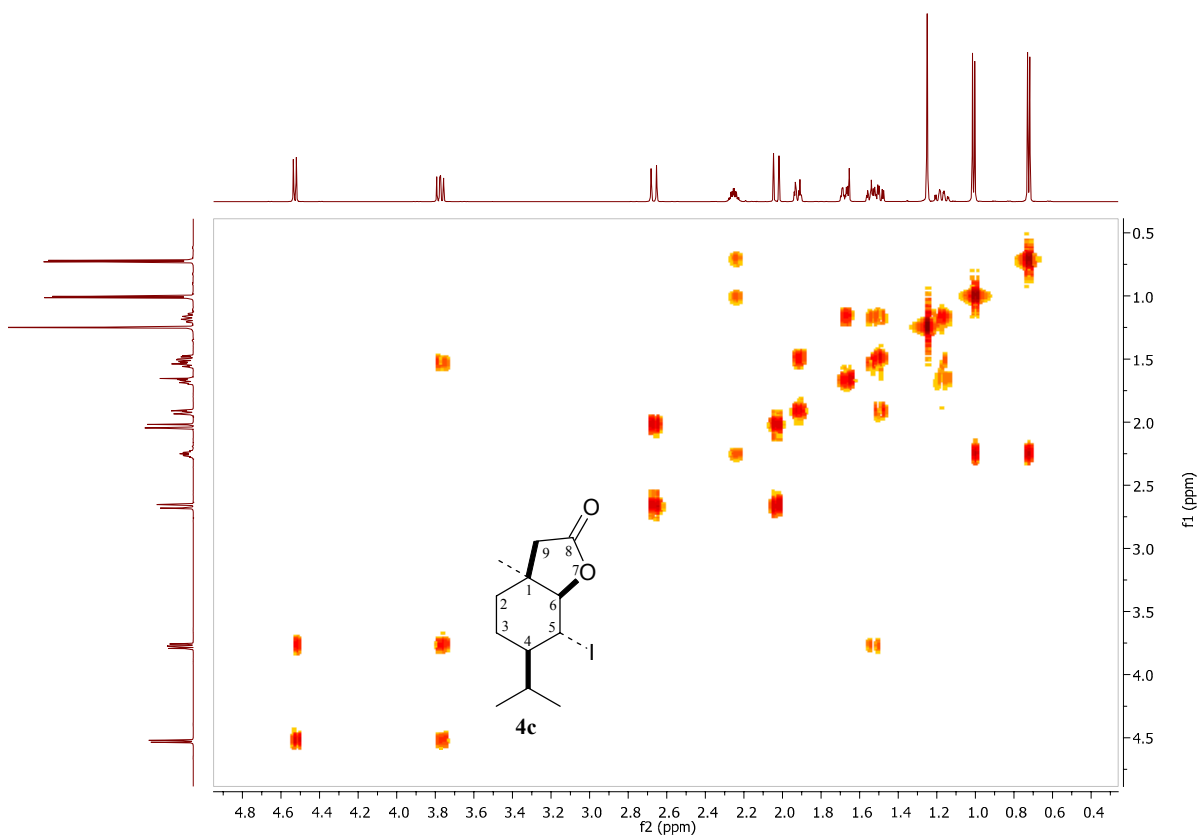

Fig. 10. COSY spectrum of **4c**.

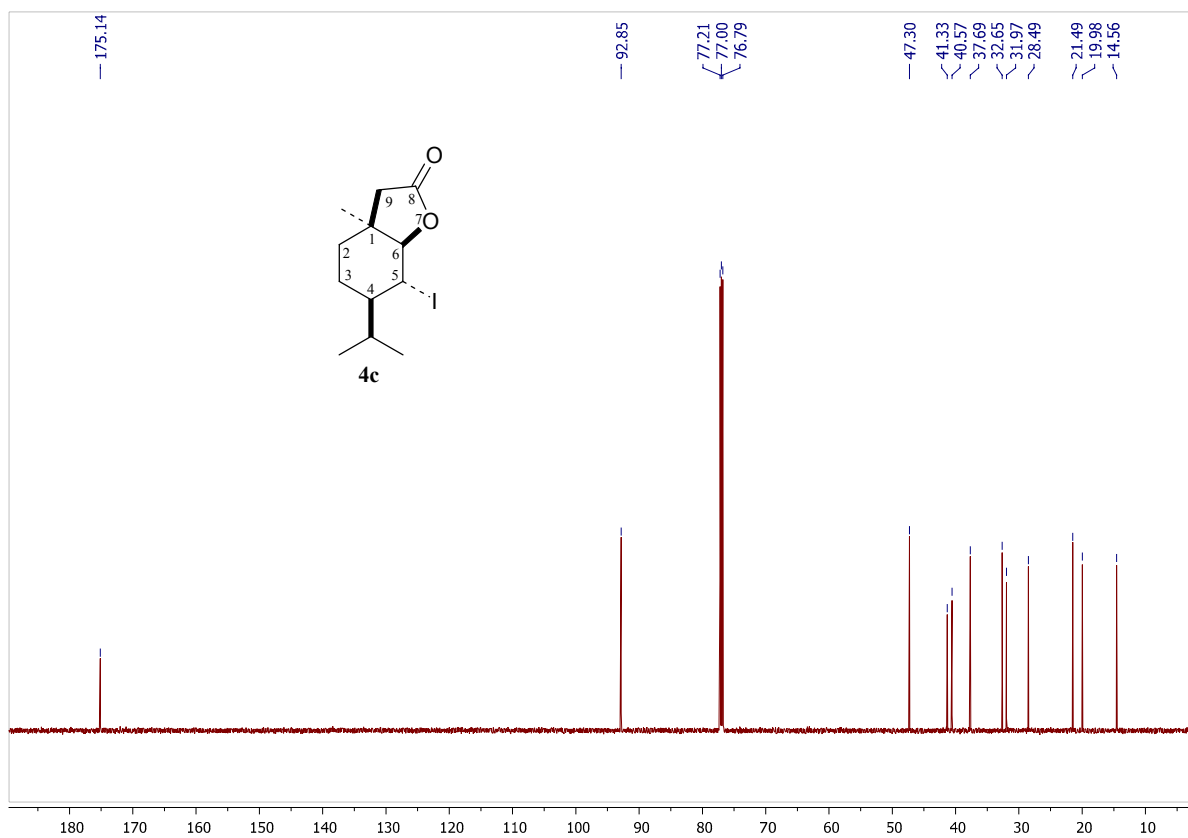

Fig. 11.  $^{13}\text{C}$  NMR (CDCl<sub>3</sub>, 151 MHz) spectrum of **4c**.

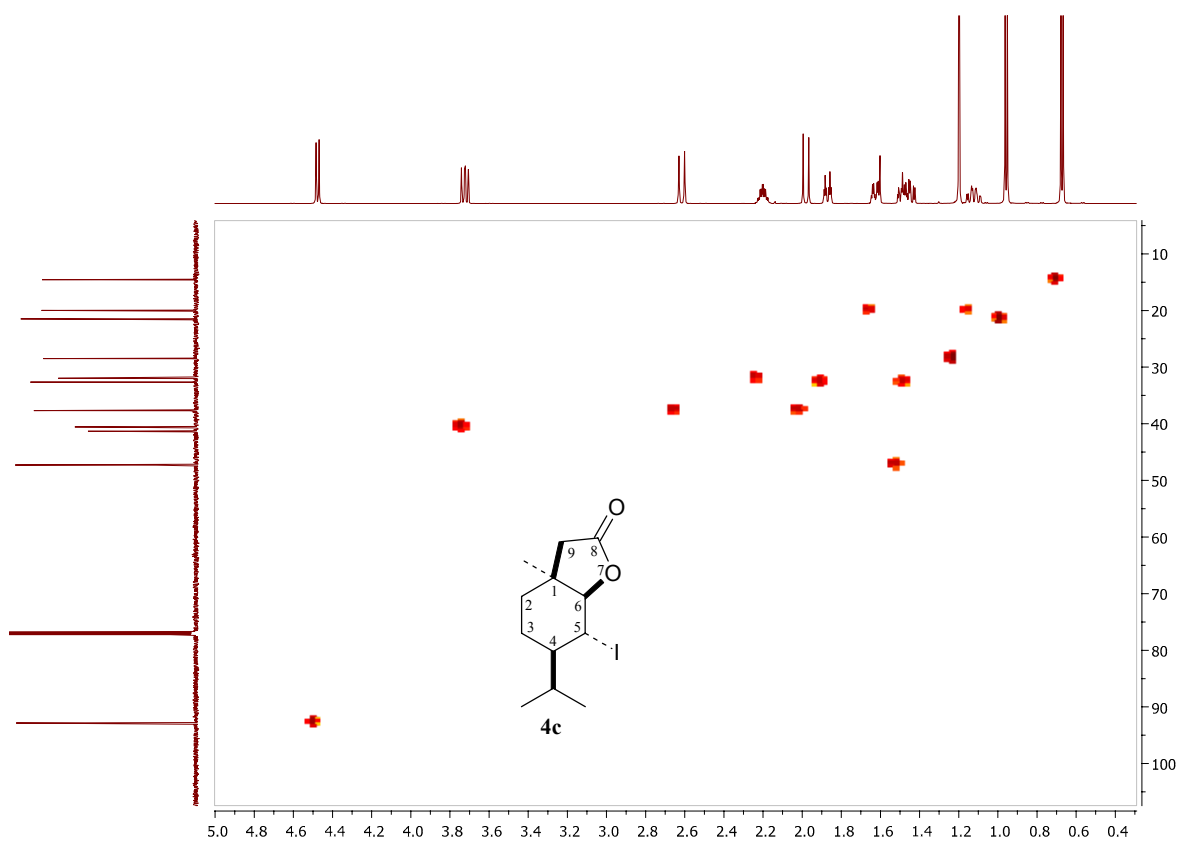

Fig. 12. HSQC spectrum of **4c**.

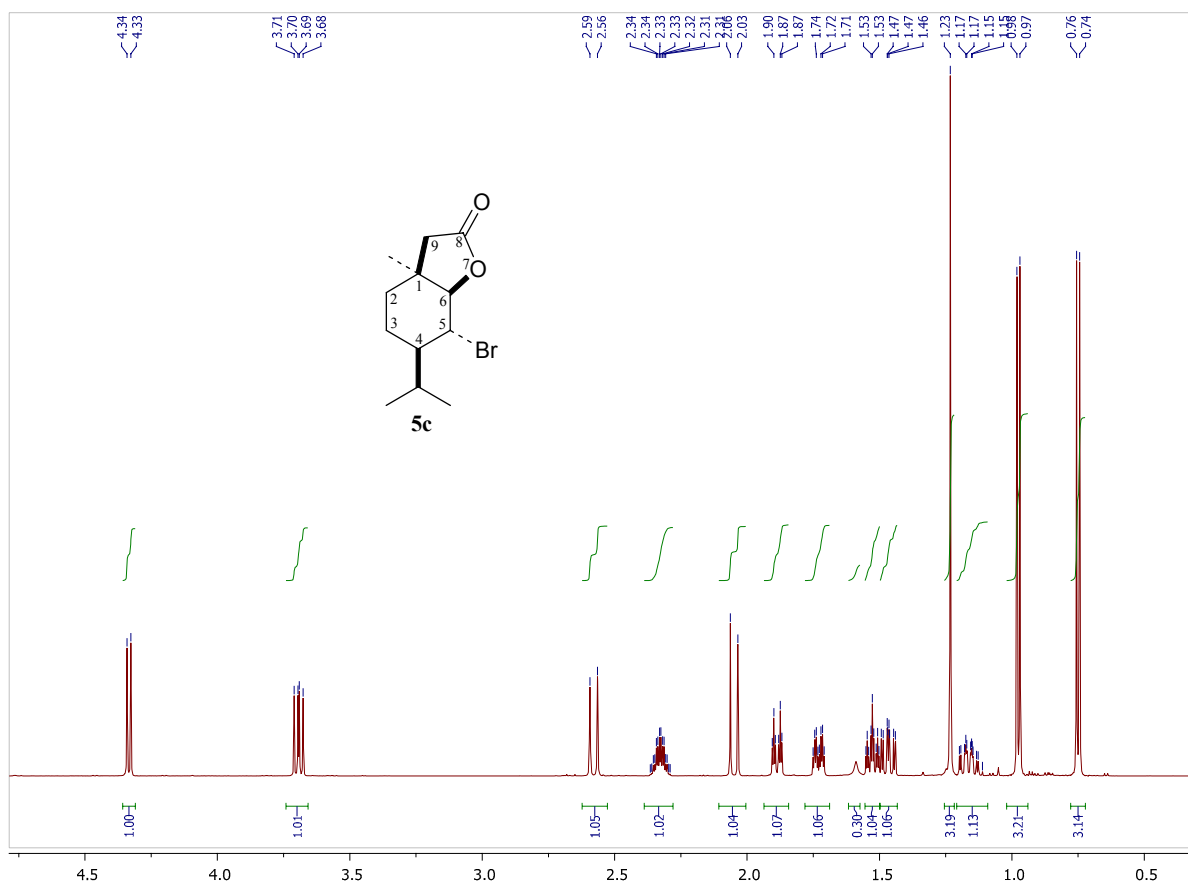

Fig. 13. <sup>1</sup>H NMR (CDCl<sub>3</sub>, 600 MHz) spectrum of **5c**.

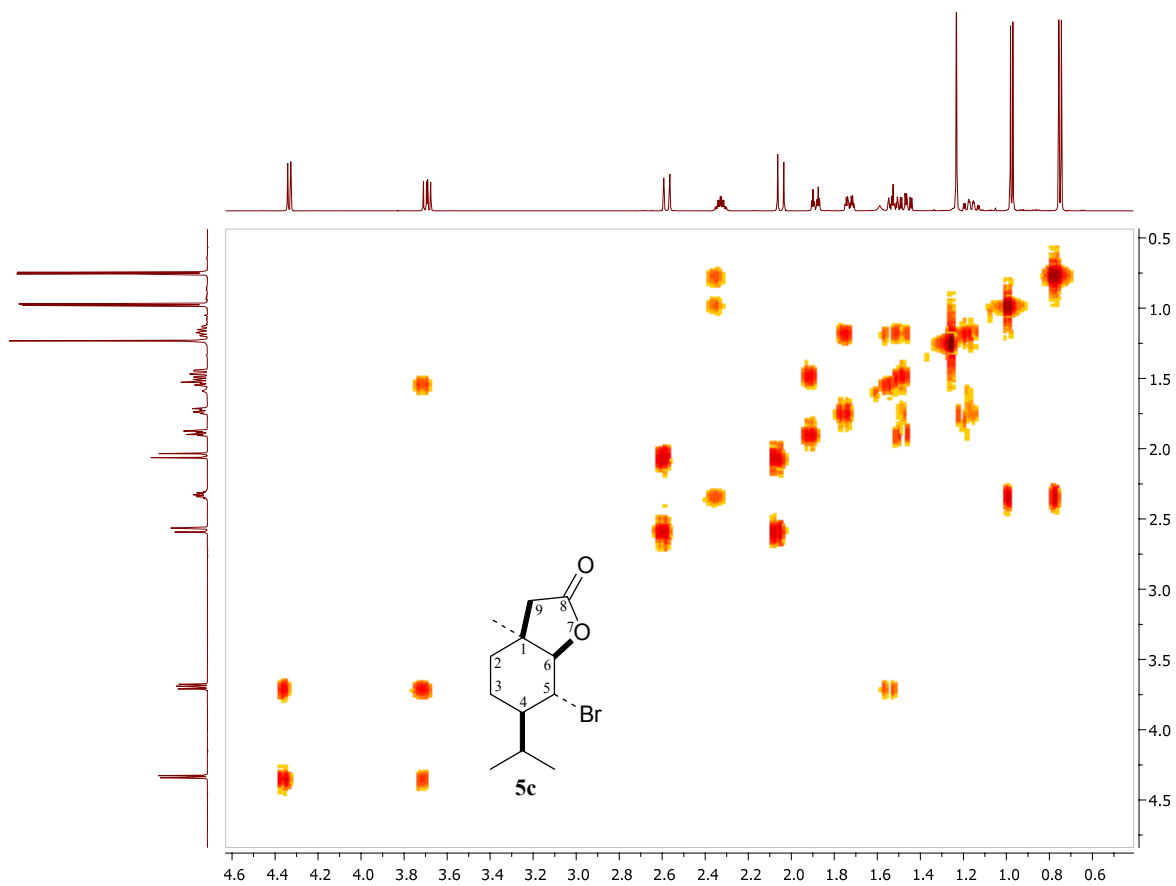

Fig. 14. COSY spectrum of **5c**.



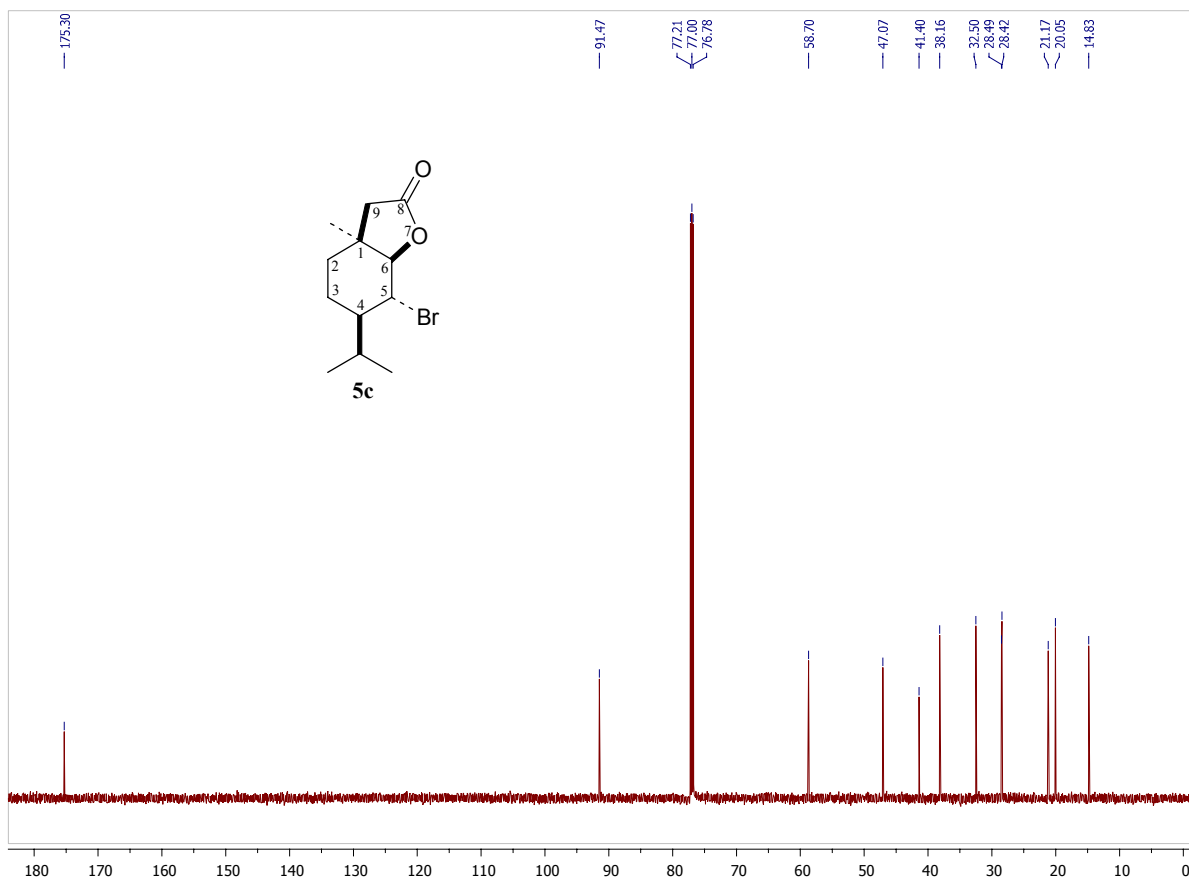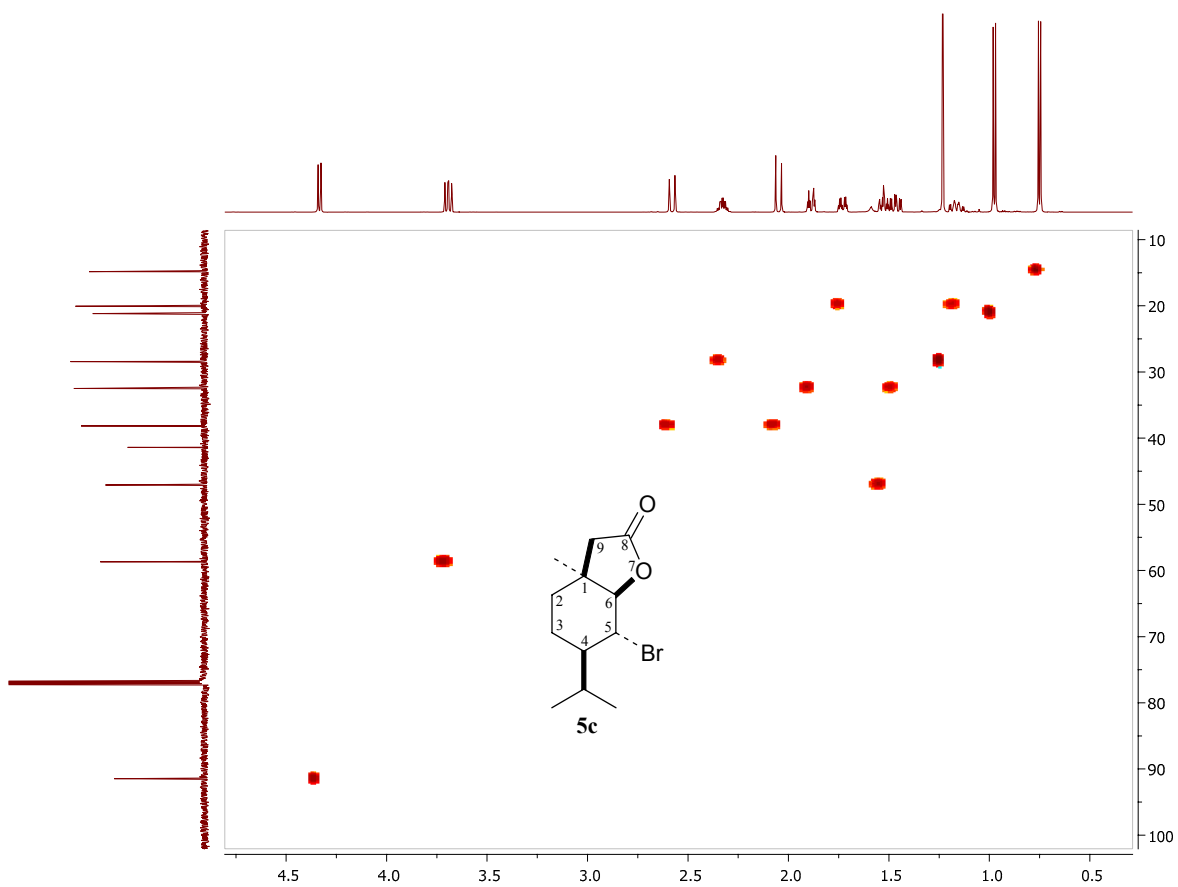

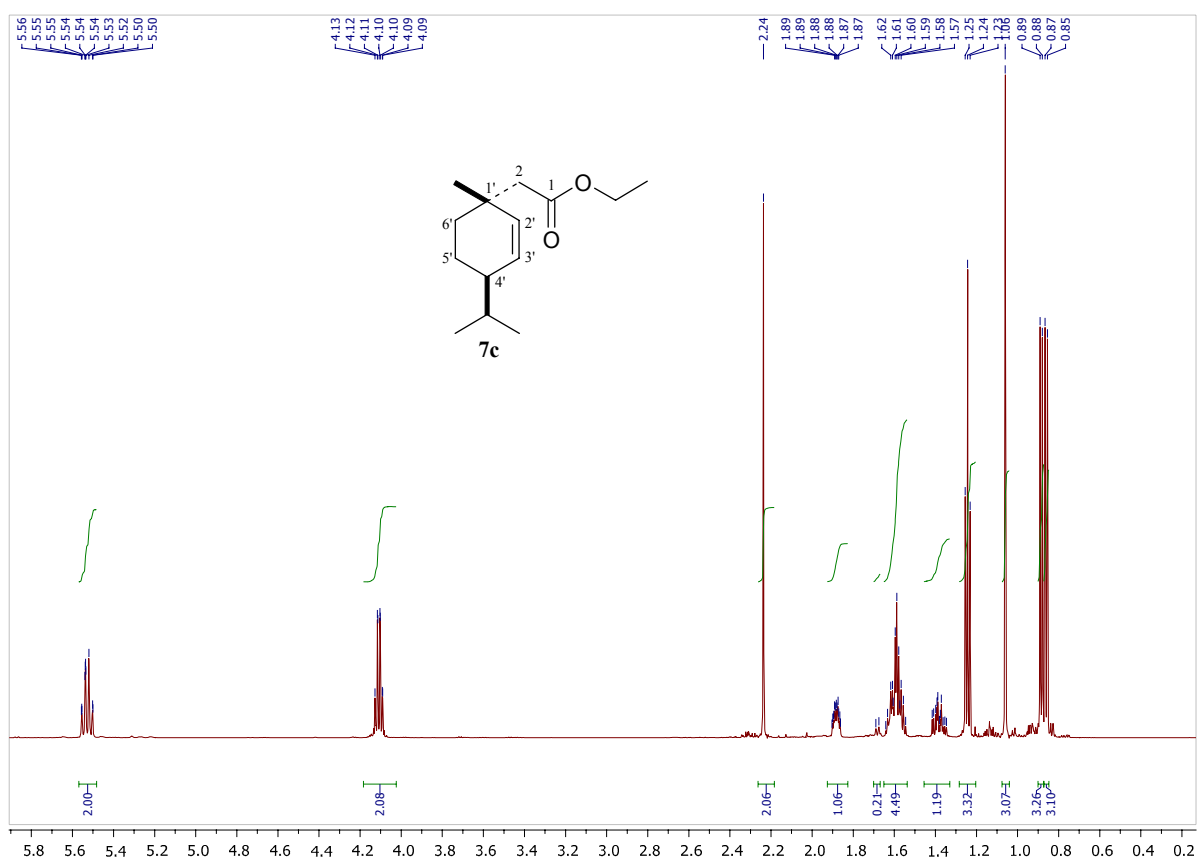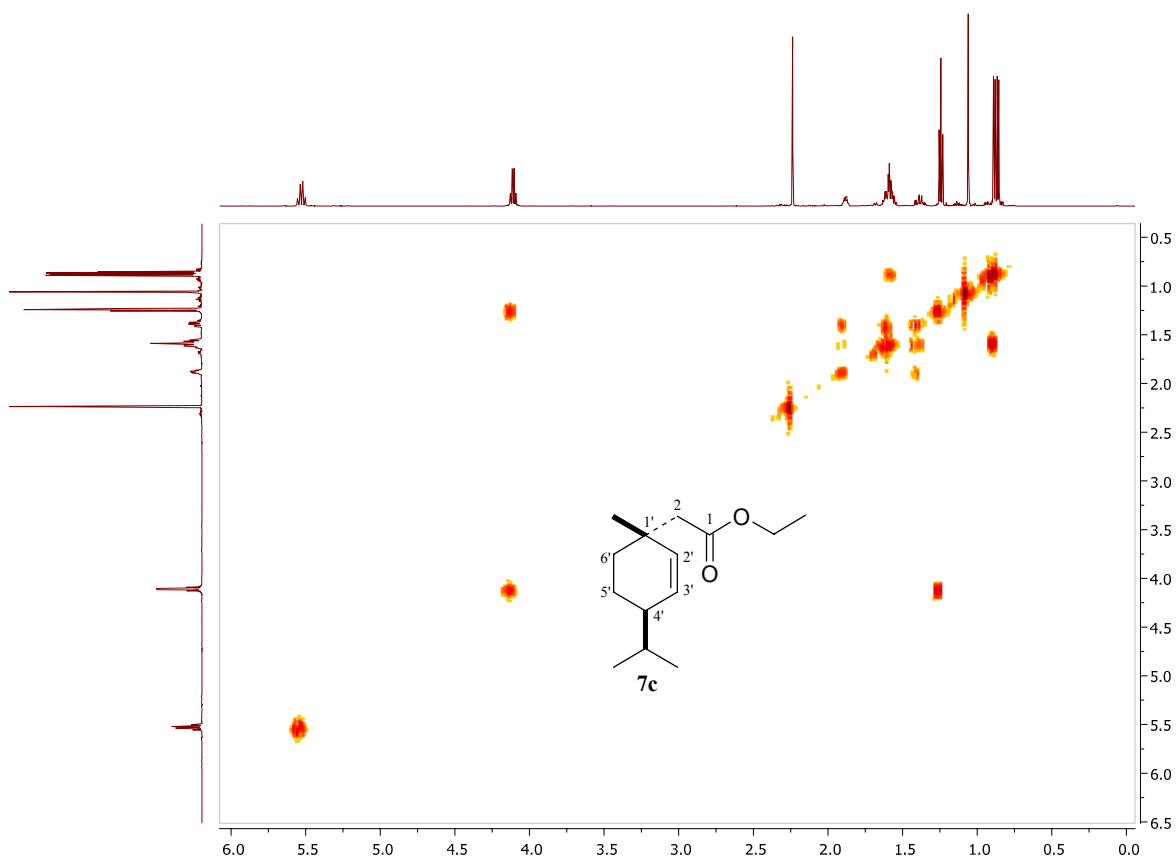

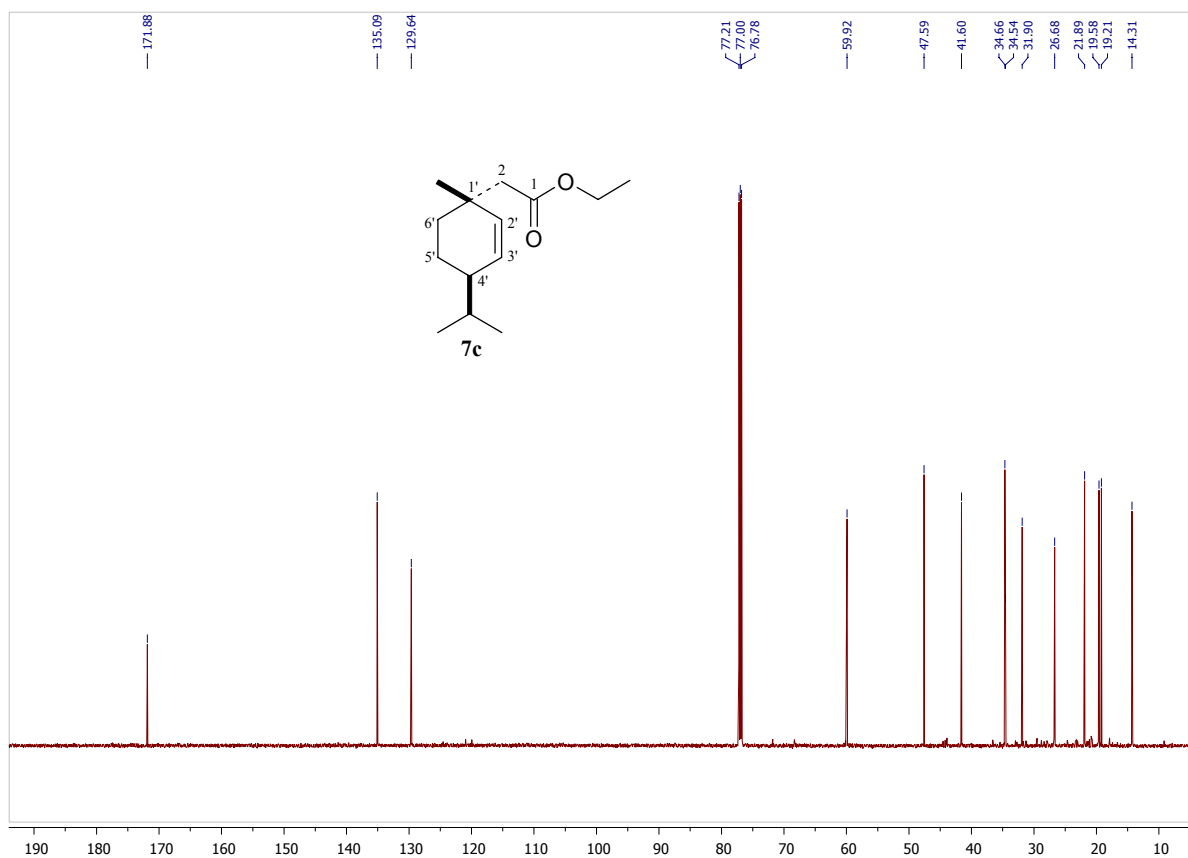

Fig. 19.  $^{13}\text{C}$  NMR ( $\text{CDCl}_3$ , 151 MHz) spectrum of **7c**.

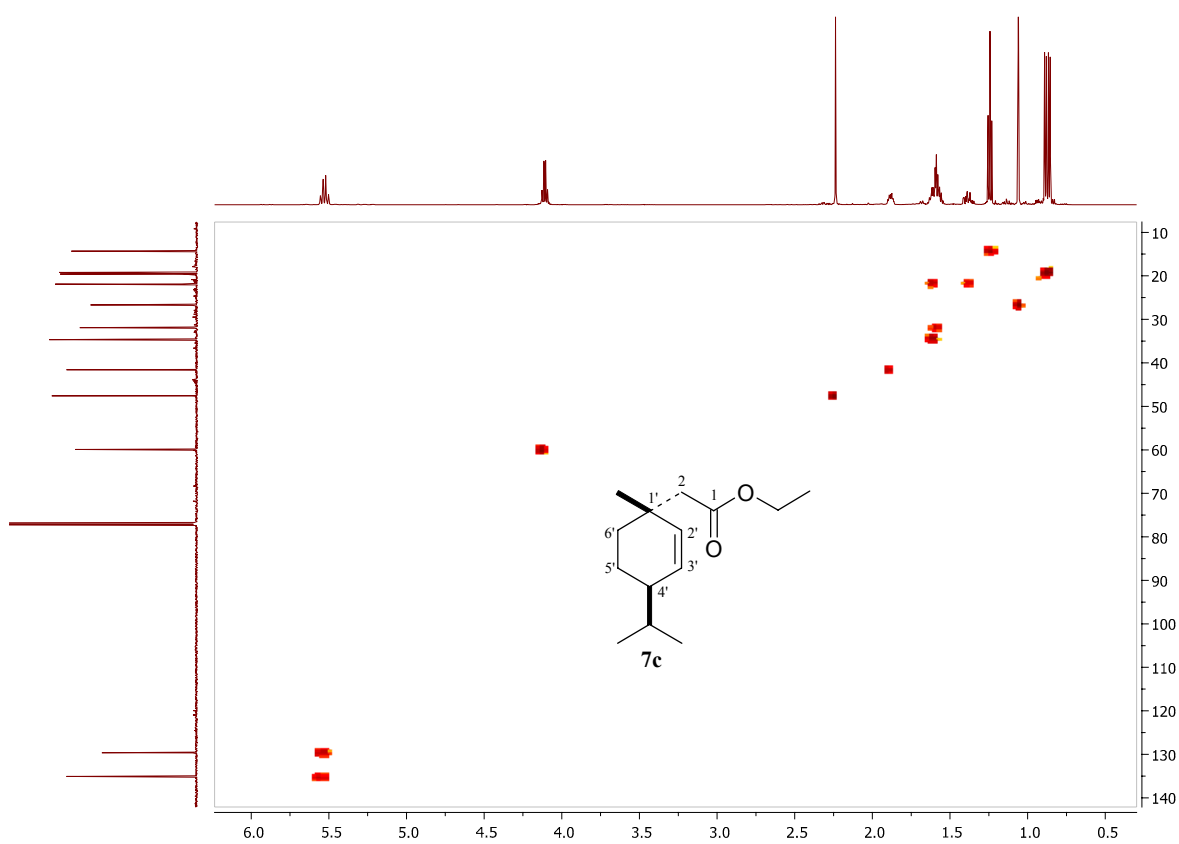

Fig. 20. HSQC spectrum of **7c**.

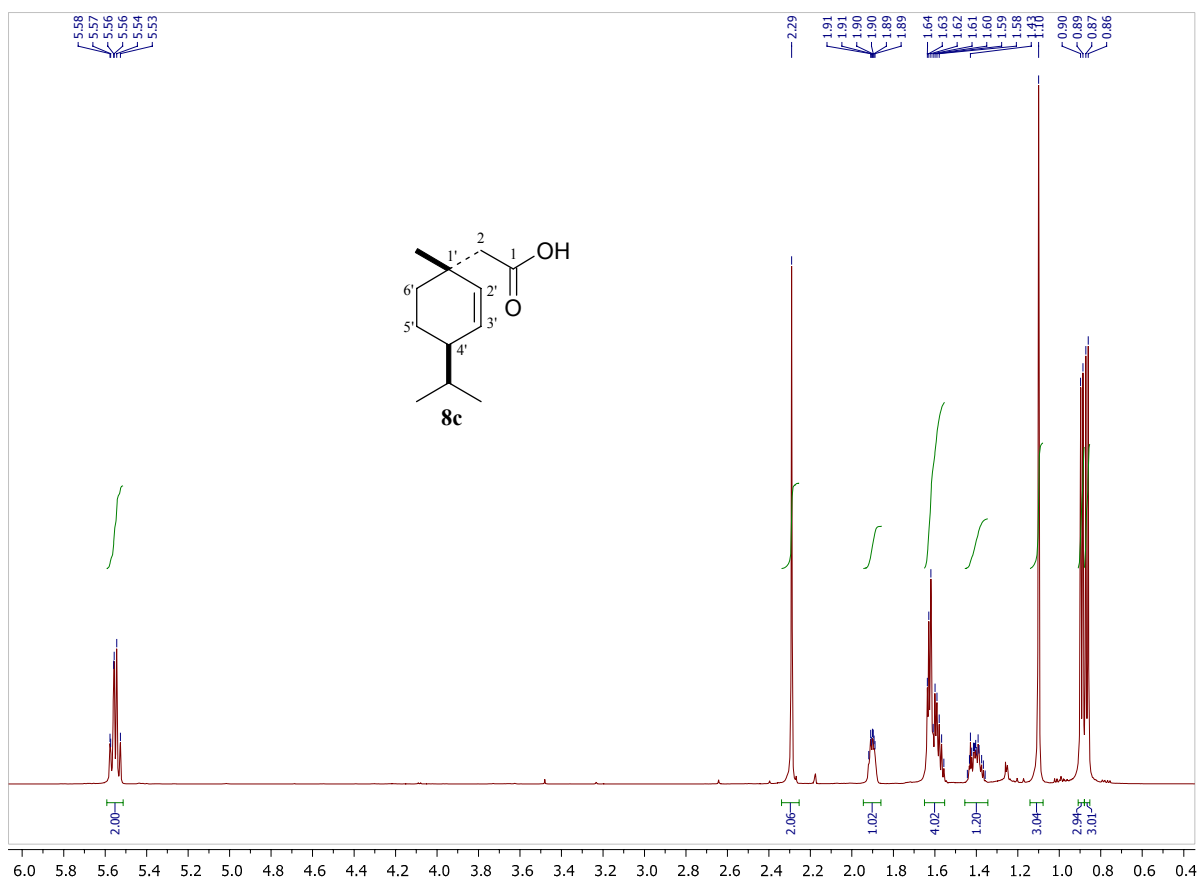

Fig. 21.  $^1\text{H}$  NMR (CDCl<sub>3</sub>, 600 MHz) spectrum of **8c**.

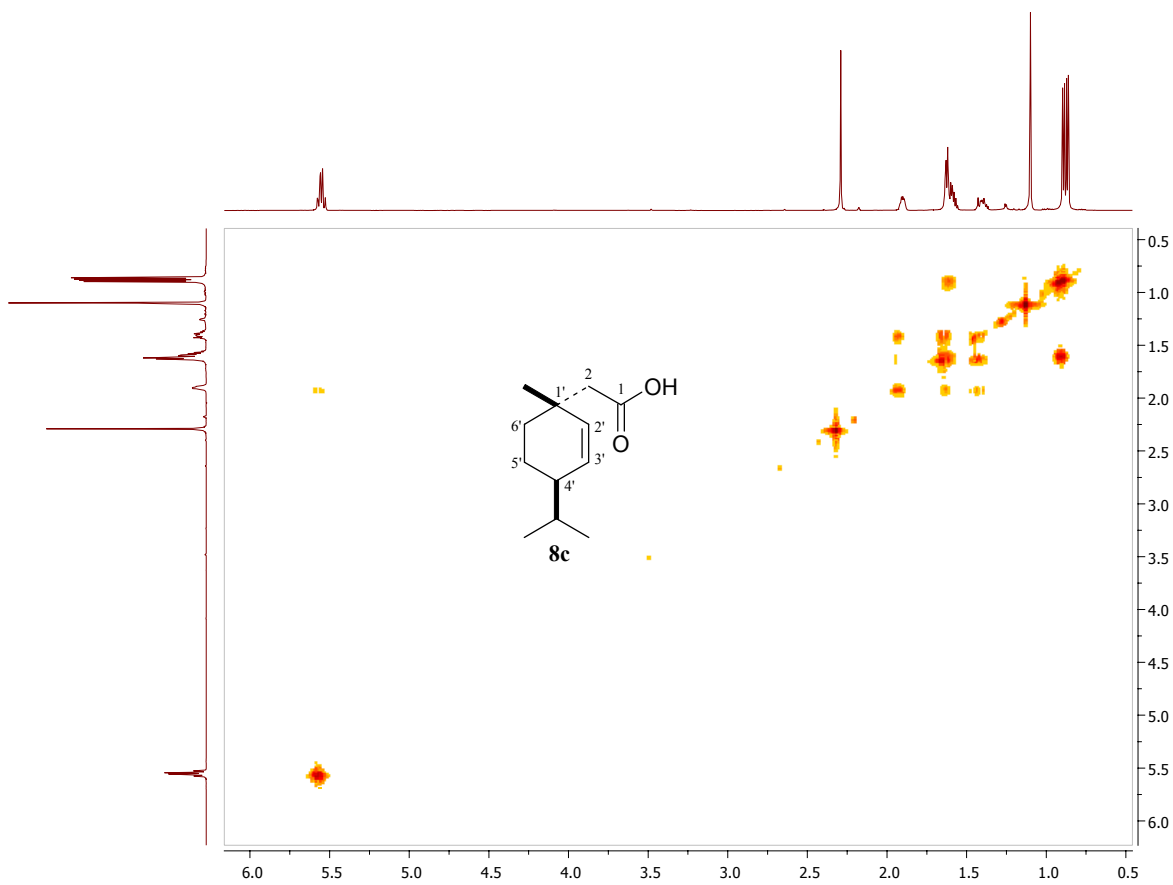

Fig. 22. COSY spectrum of **8c**.

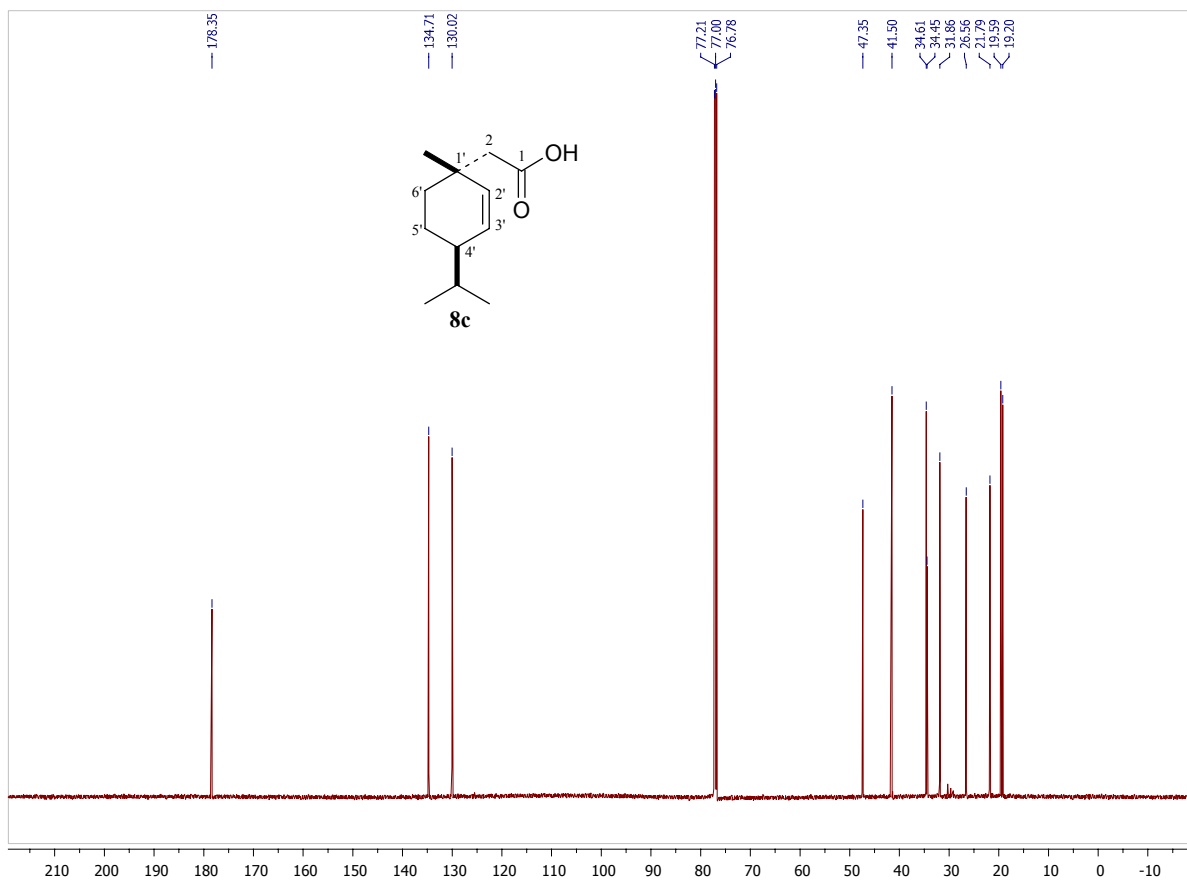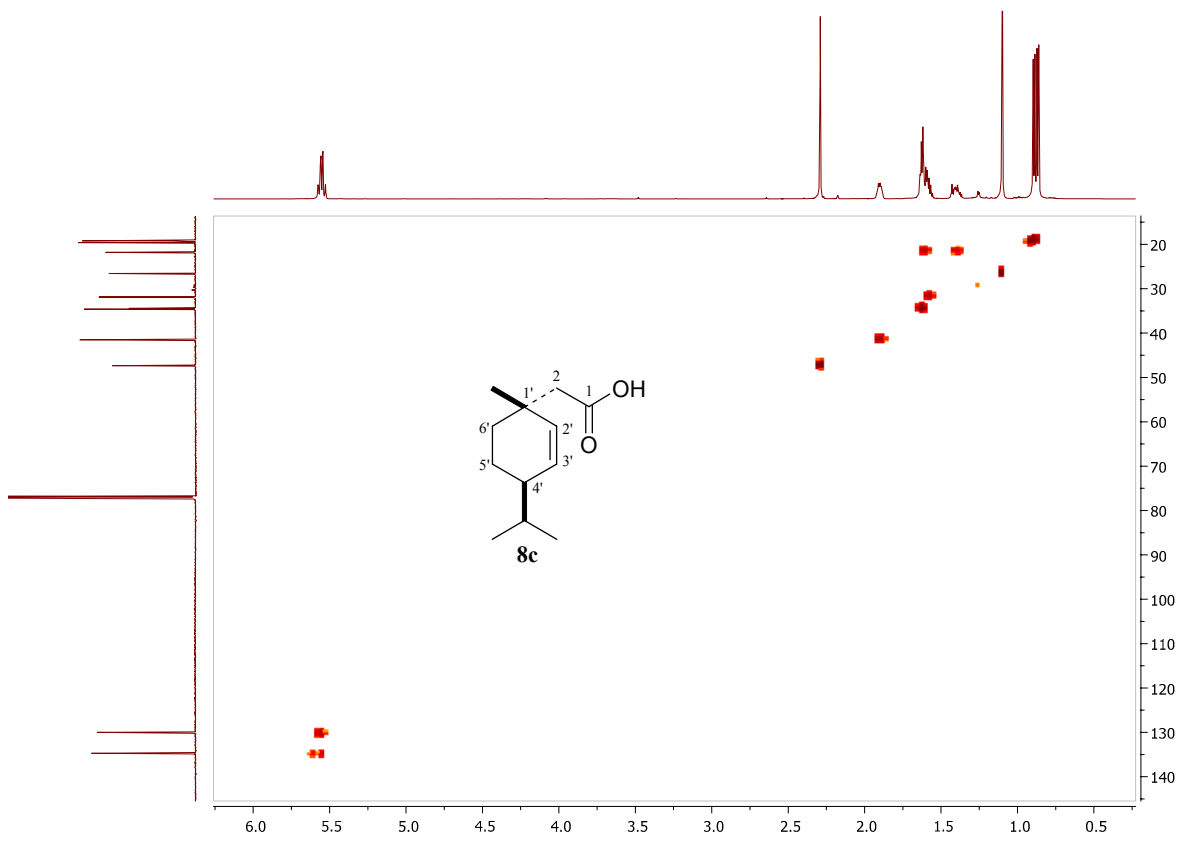

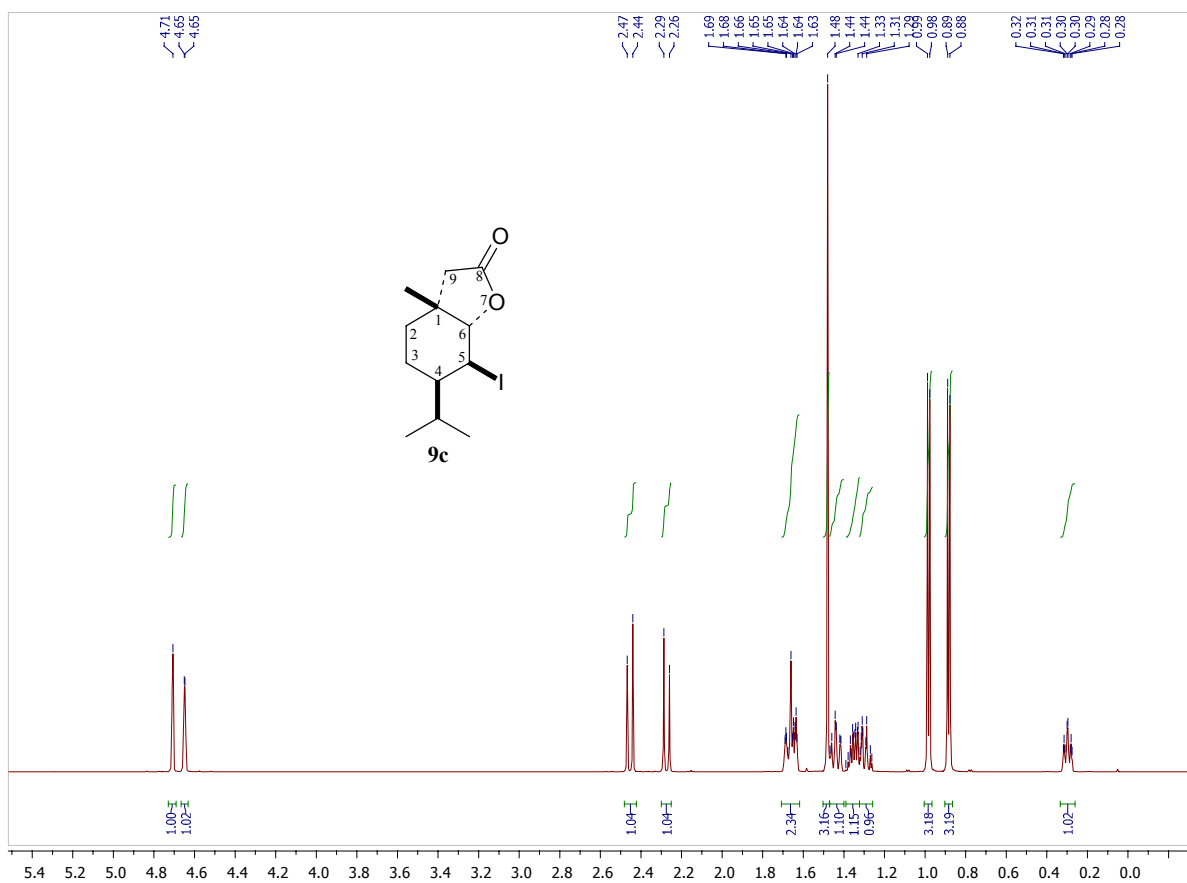

Fig. 25. <sup>1</sup>H NMR (CDCl<sub>3</sub>, 600 MHz) spectrum of **9c**.

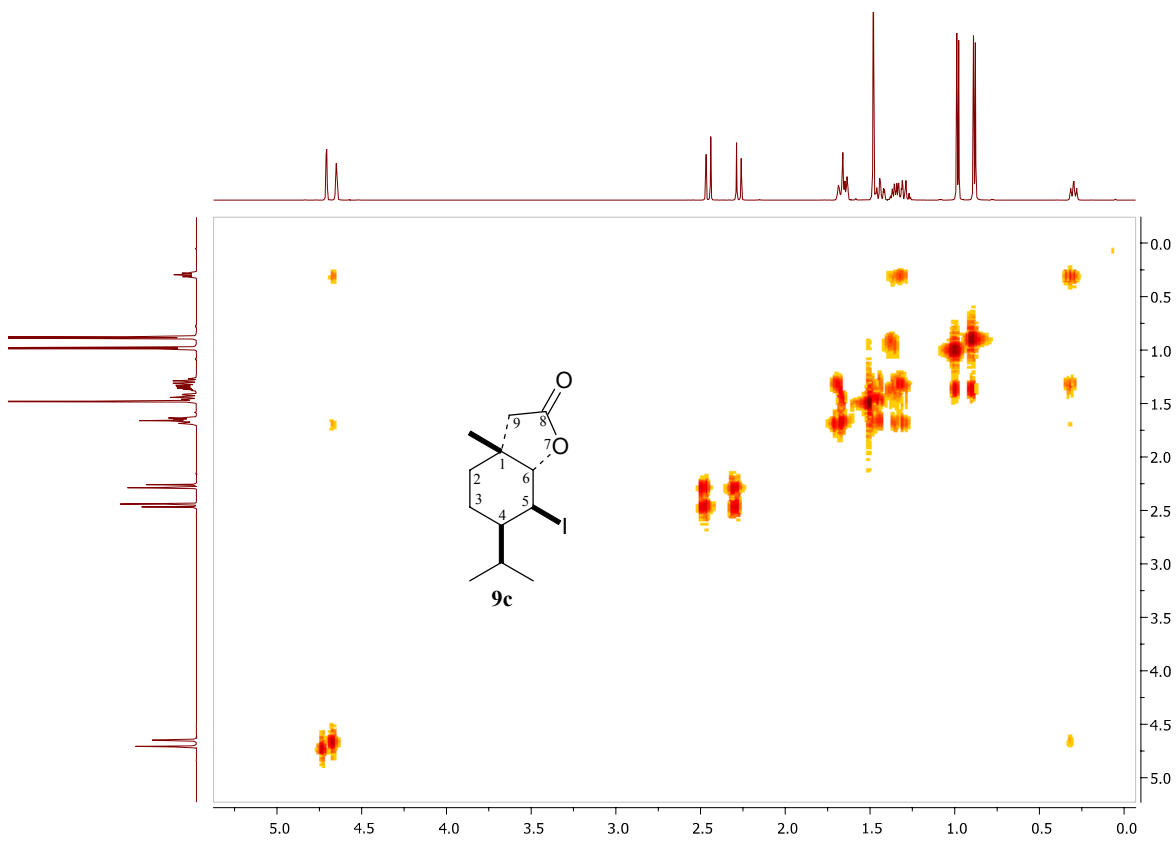

Fig. 26. COSY spectrum of **9c**.

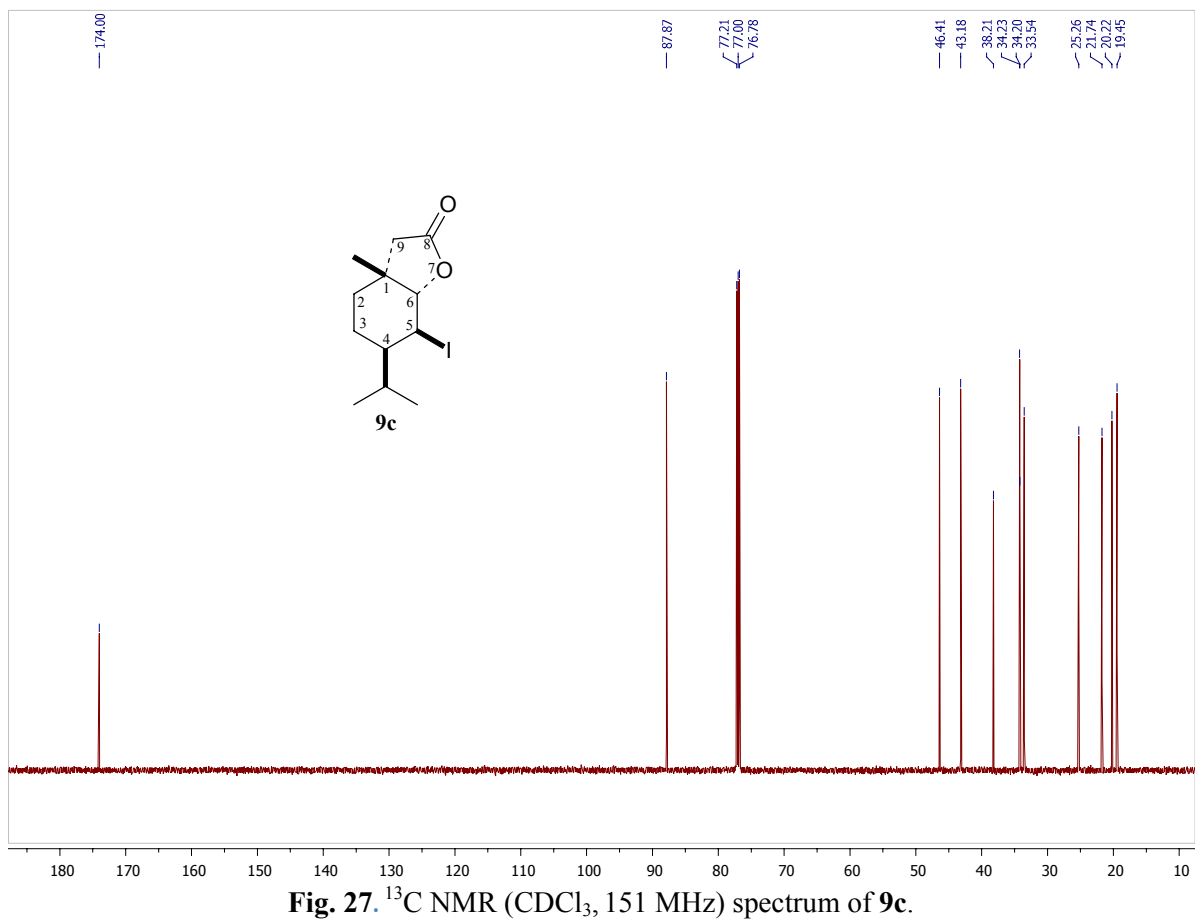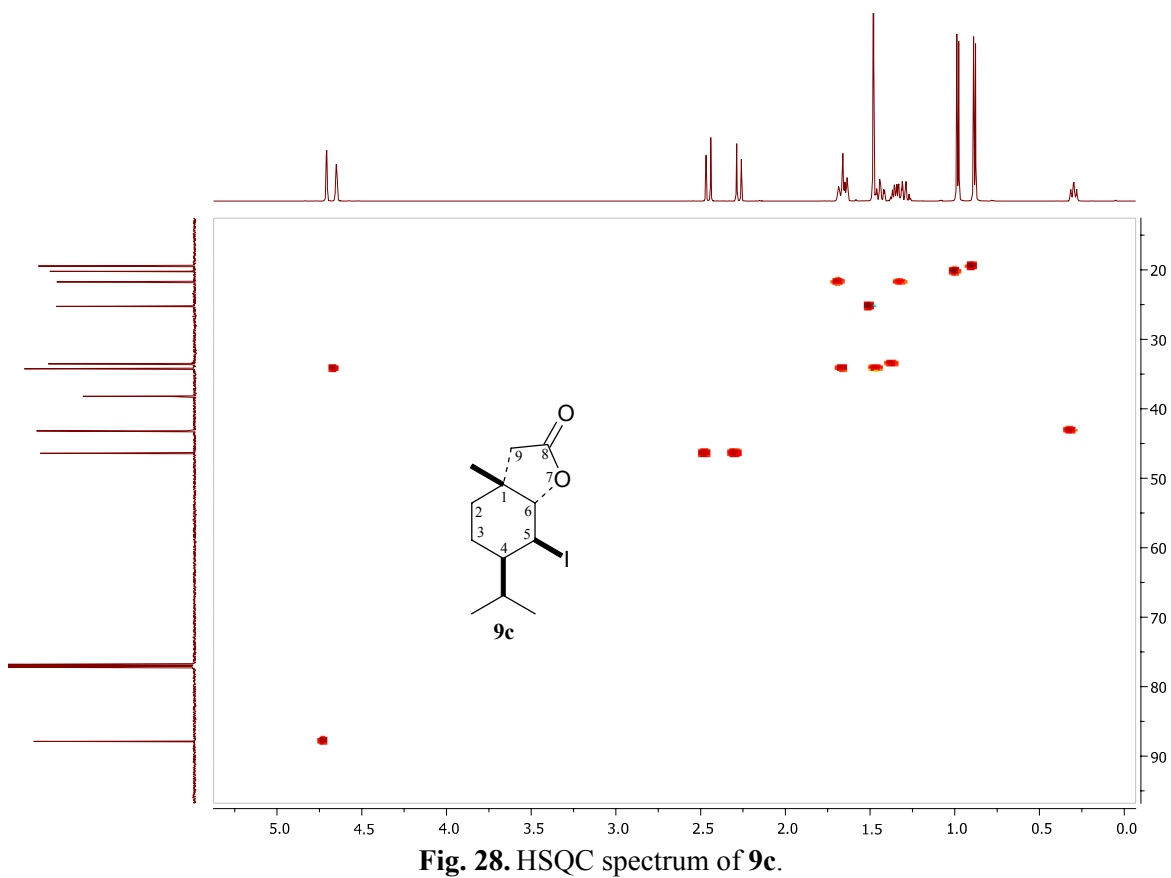

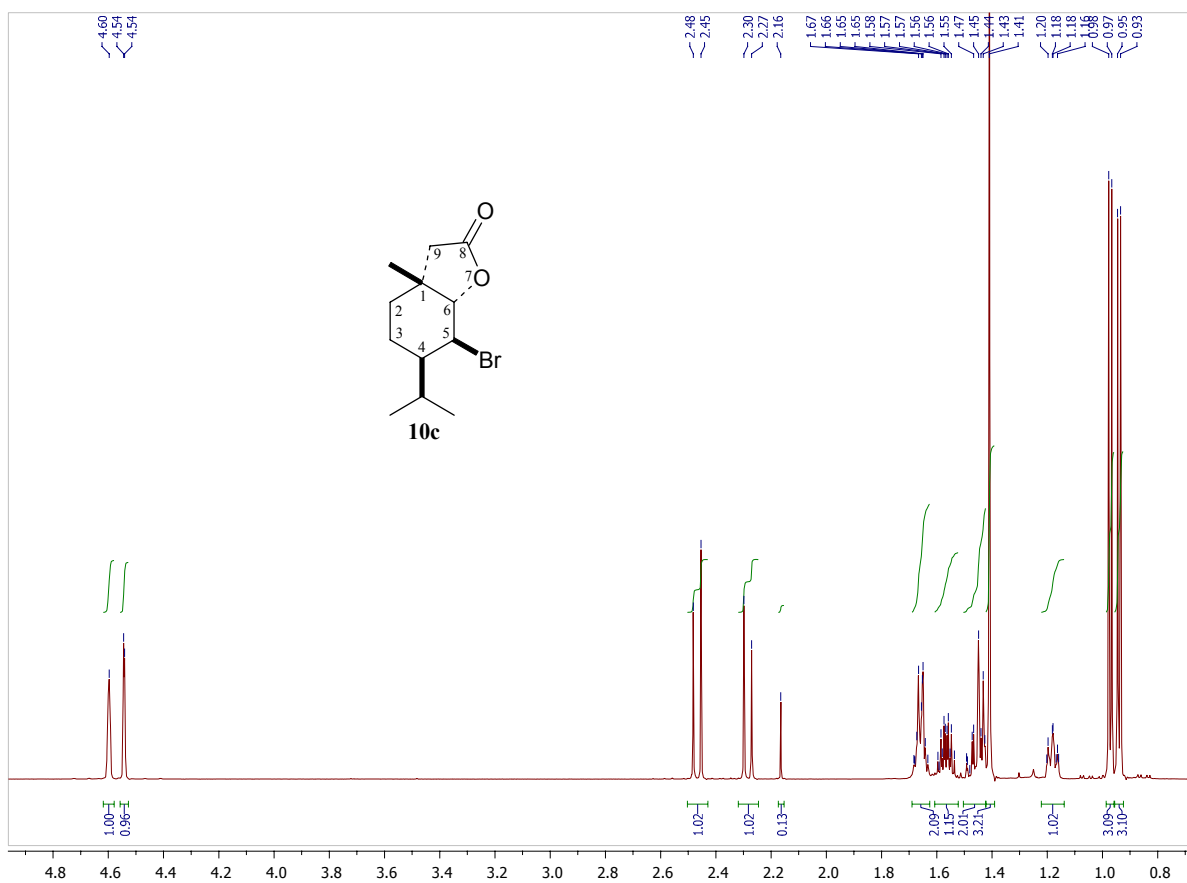

Fig. 29. <sup>1</sup>H NMR (CDCl<sub>3</sub>, 600 MHz) spectrum of **10c**.

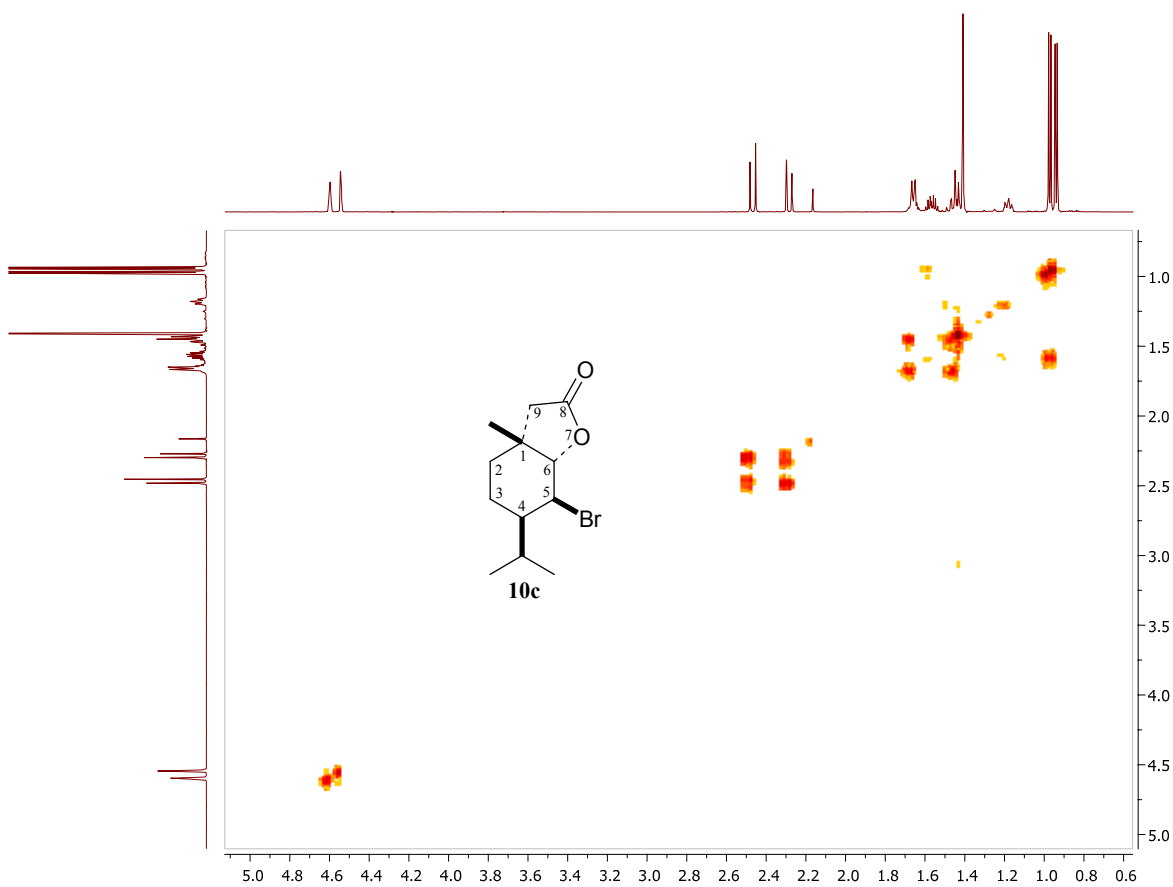

Fig. 30. COSY spectrum of **10c**.



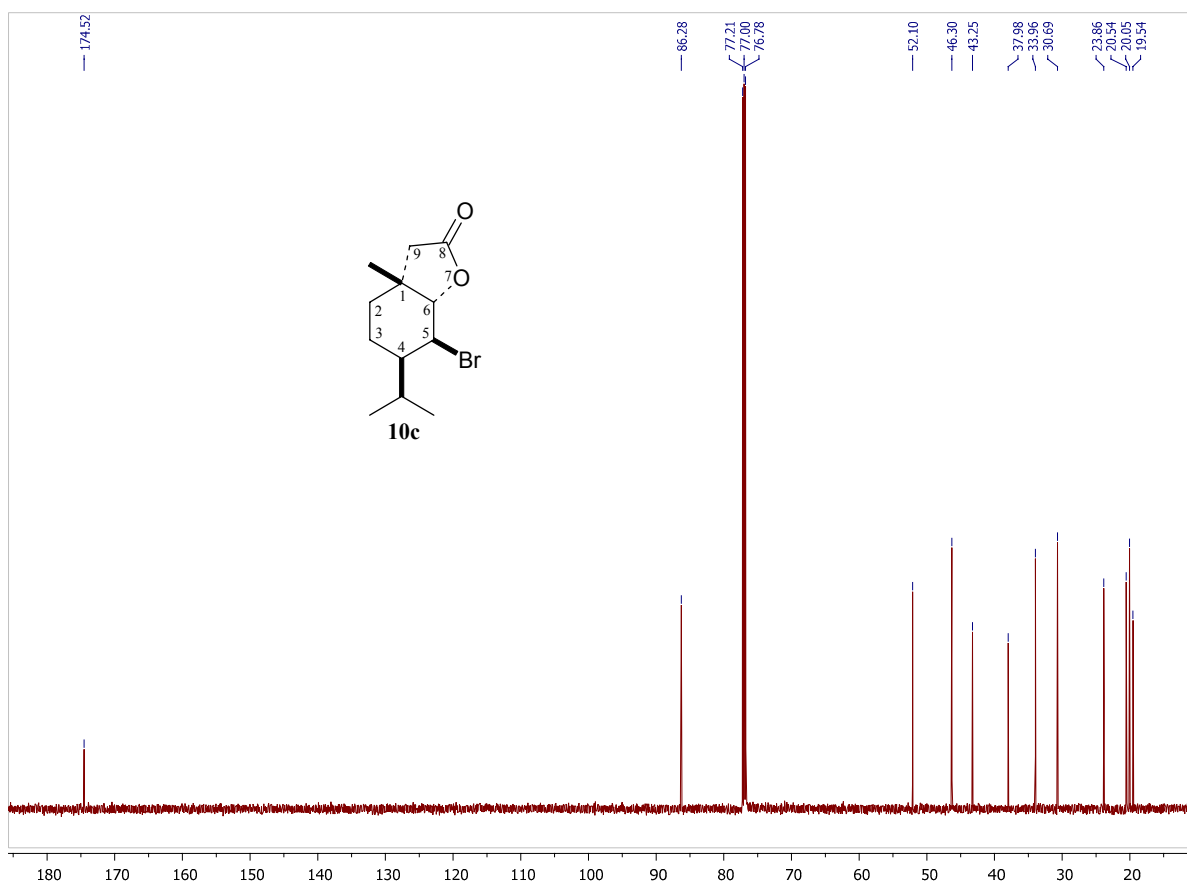

Fig. 31.  $^{13}\text{C}$  NMR (CDCl<sub>3</sub>, 151 MHz) spectrum of **10c**.

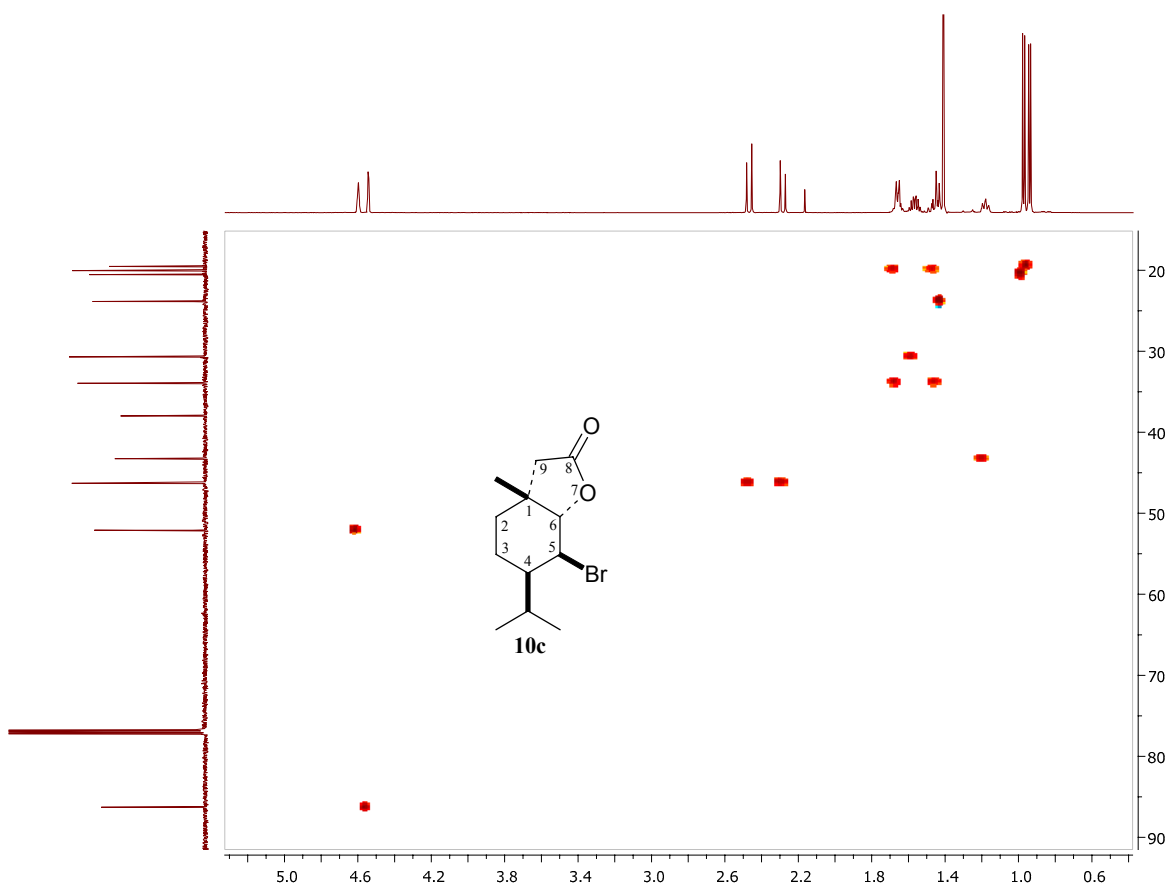

Fig. 32. HSQC spectrum of **10c**.

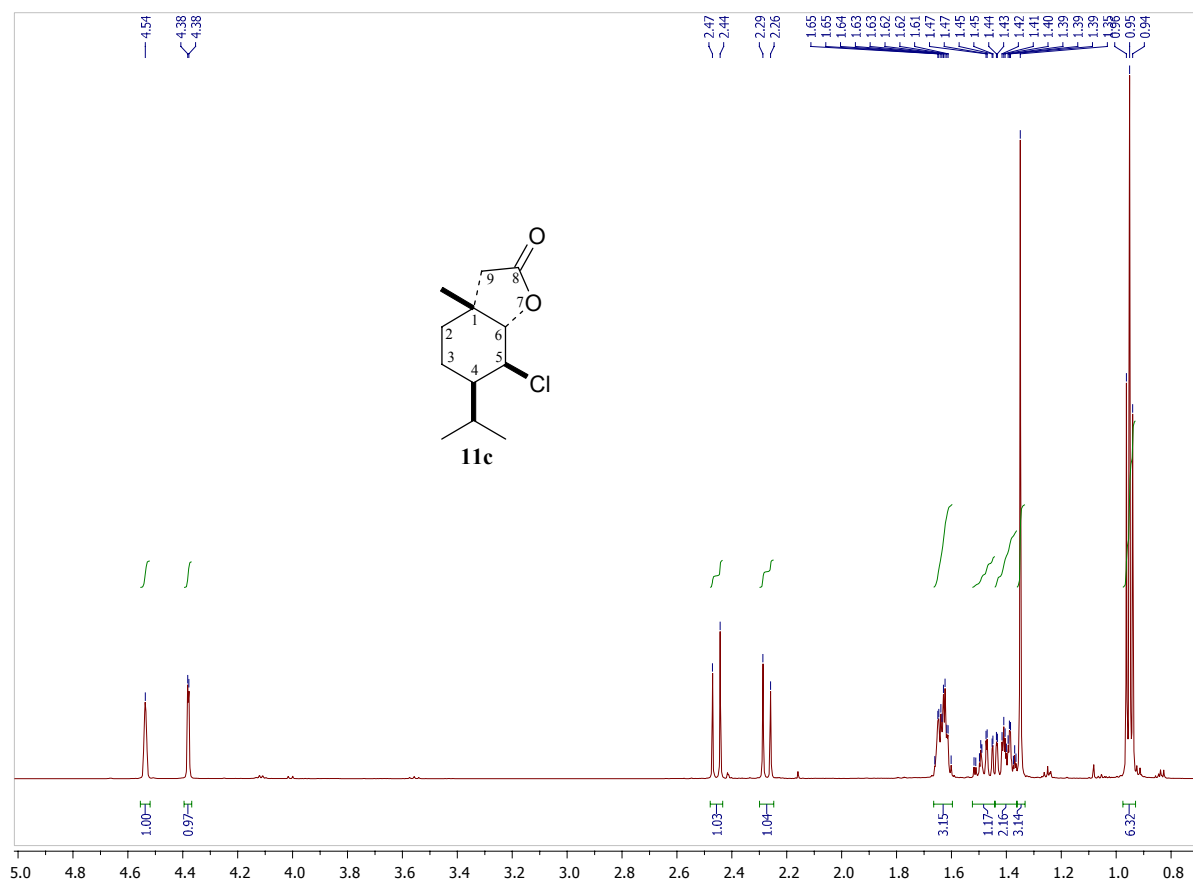

Fig. 33. <sup>1</sup>H NMR (CDCl<sub>3</sub>, 600 MHz) spectrum of **11c**.

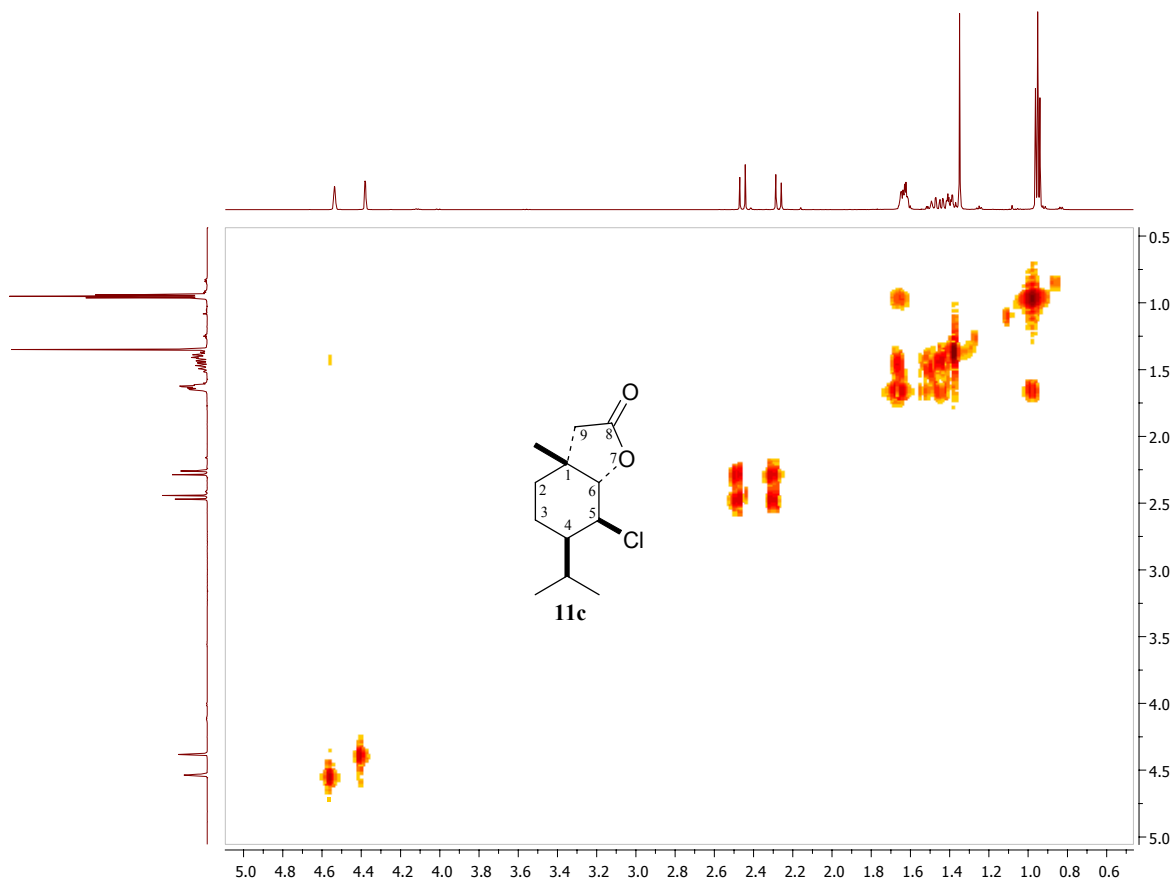

Fig. 34. COSY spectrum of **11c**.

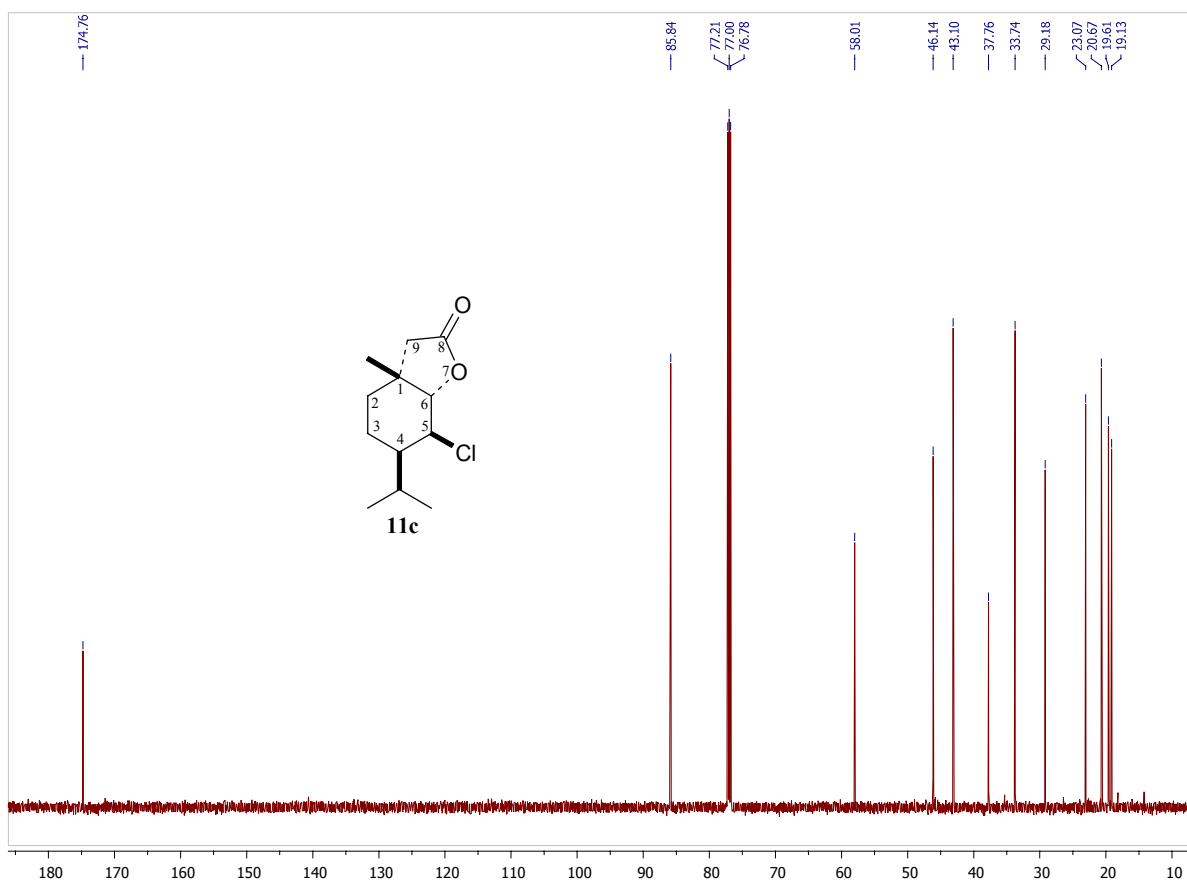

Fig. 35. <sup>13</sup>C NMR (CDCl<sub>3</sub>, 151 MHz) spectrum of **11c**.

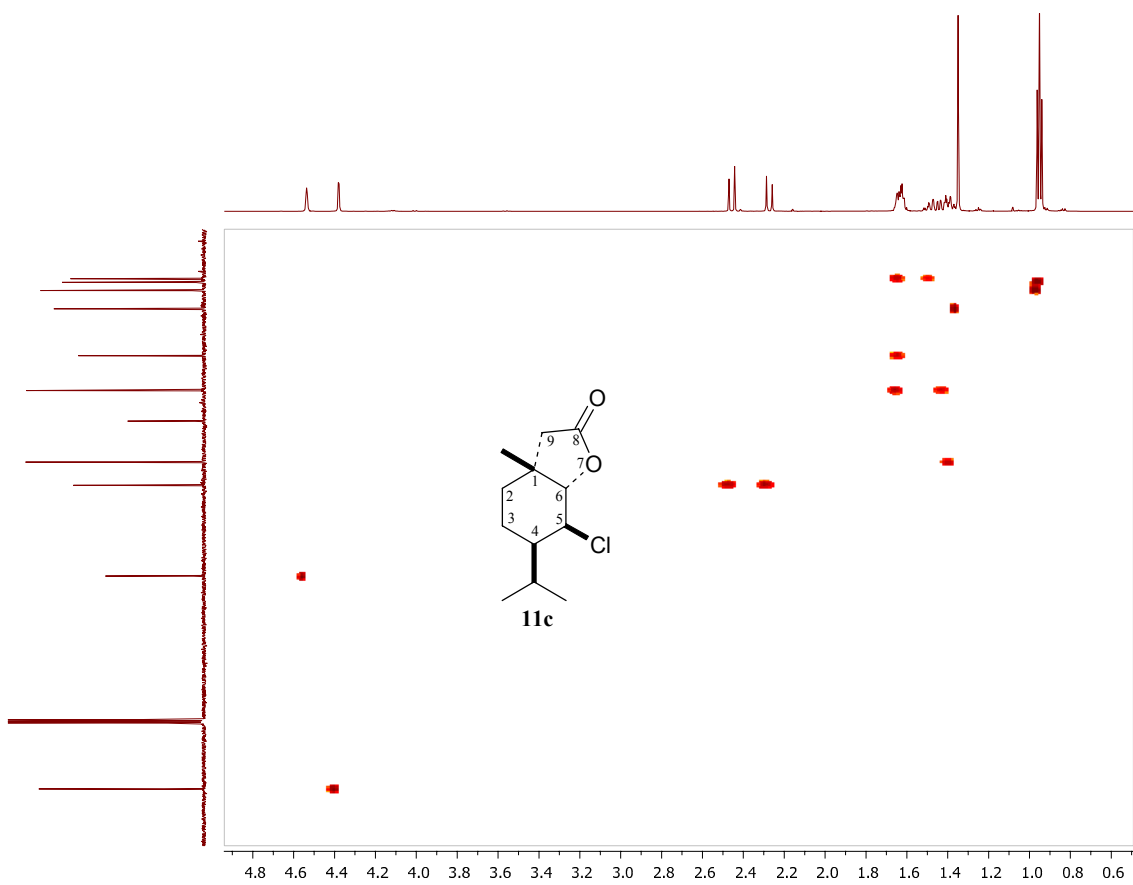

Fig. 36. HSQC spectrum of **11c**.

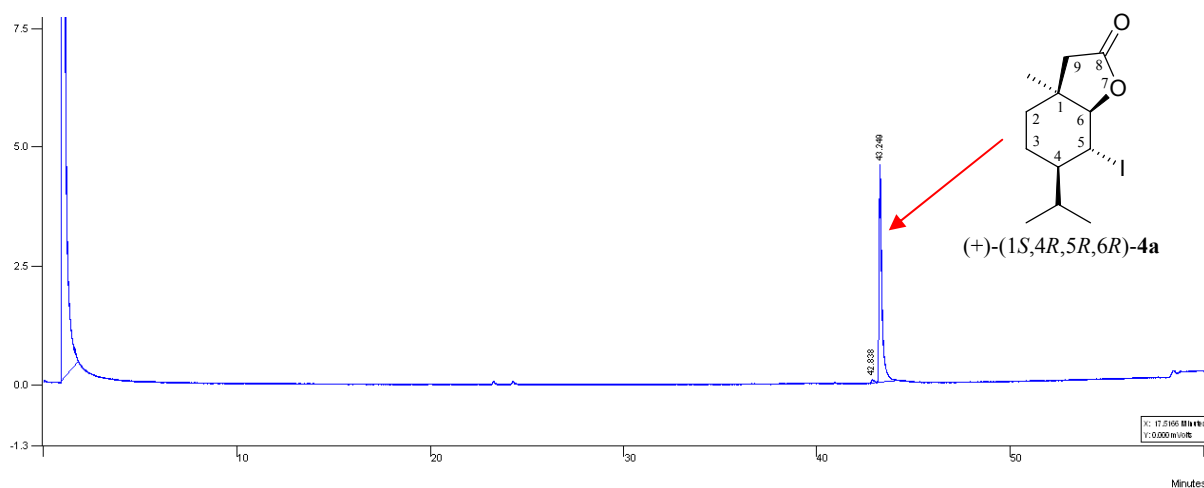

**Fig. 37.** CGC chromatogram of (+)-**4a** (ee = 97%).

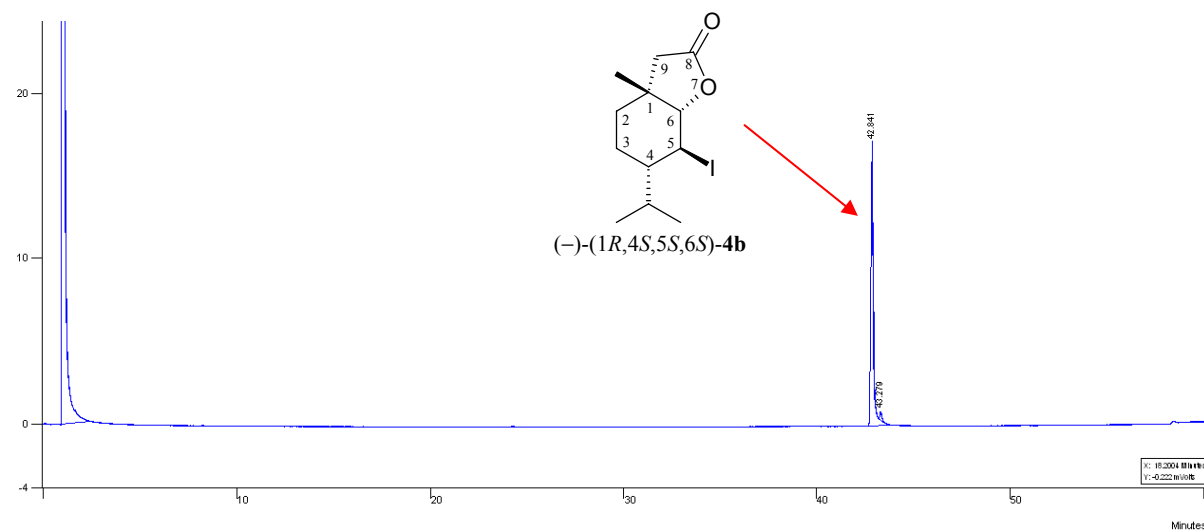

**Fig. 38.** CGC chromatogram of (-)-**4b** (ee = 96%).

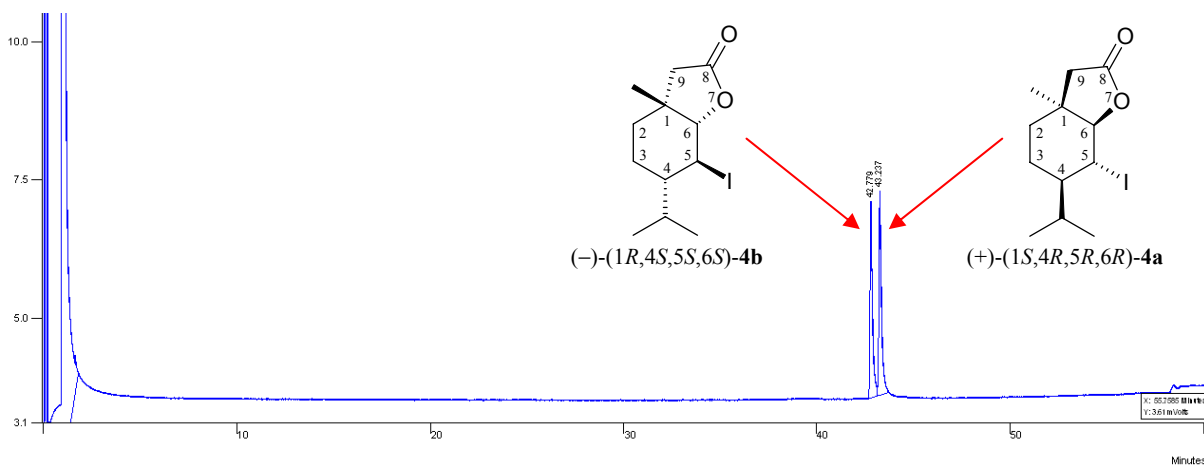

**Fig. 39.** CGC chromatogram of (±)-**4c**.

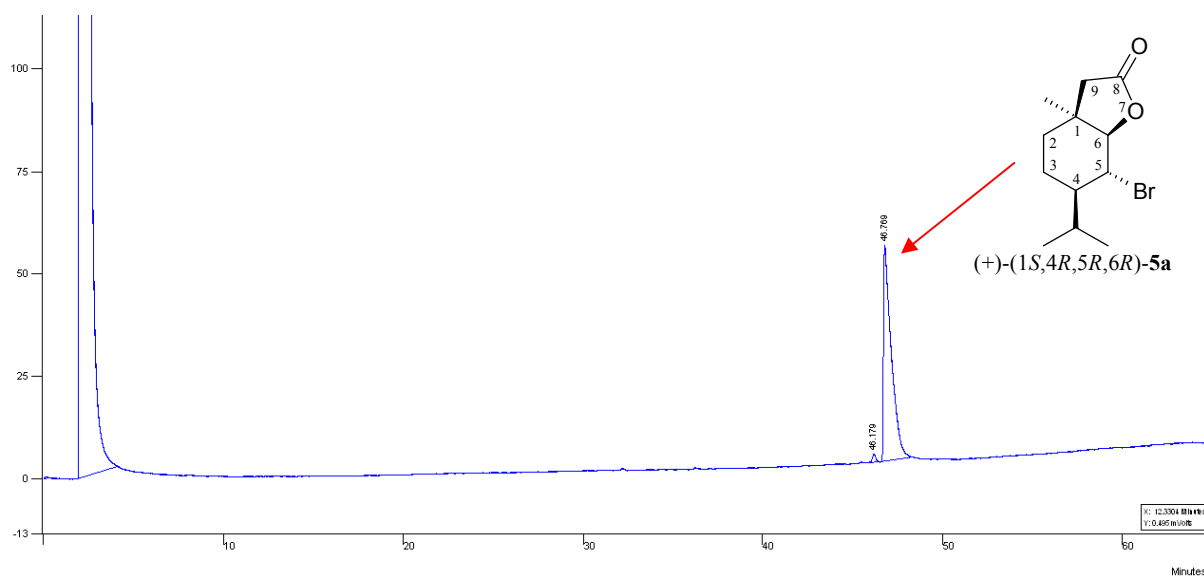

Fig. 40. CGC chromatogram of (+)-5a (ee = 97%).

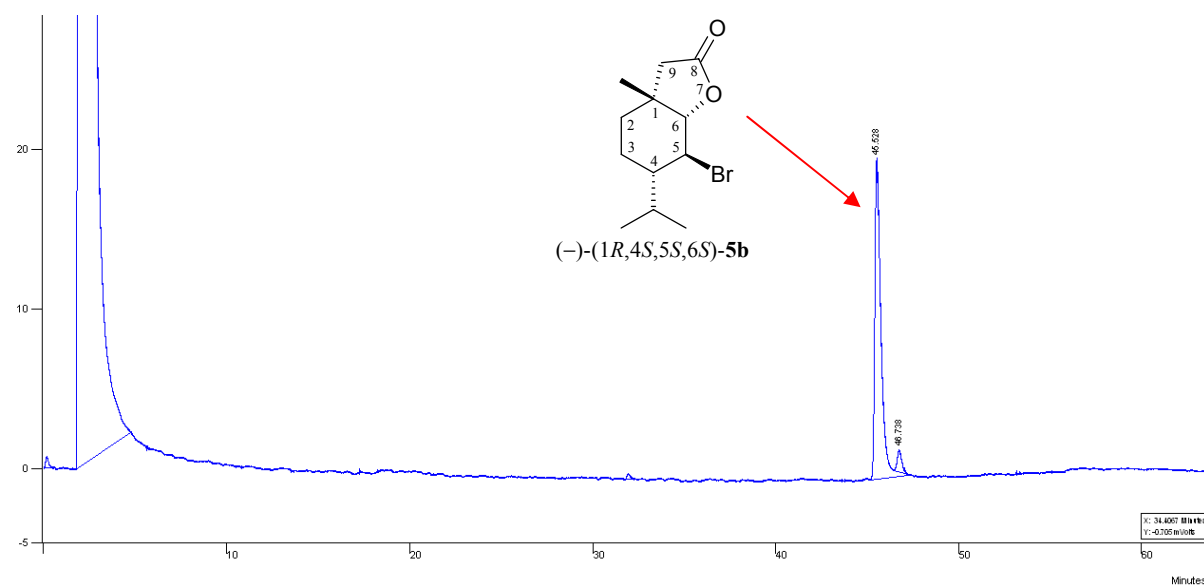

Fig. 41. CGC chromatogram of (-)-5b (ee = 91%).

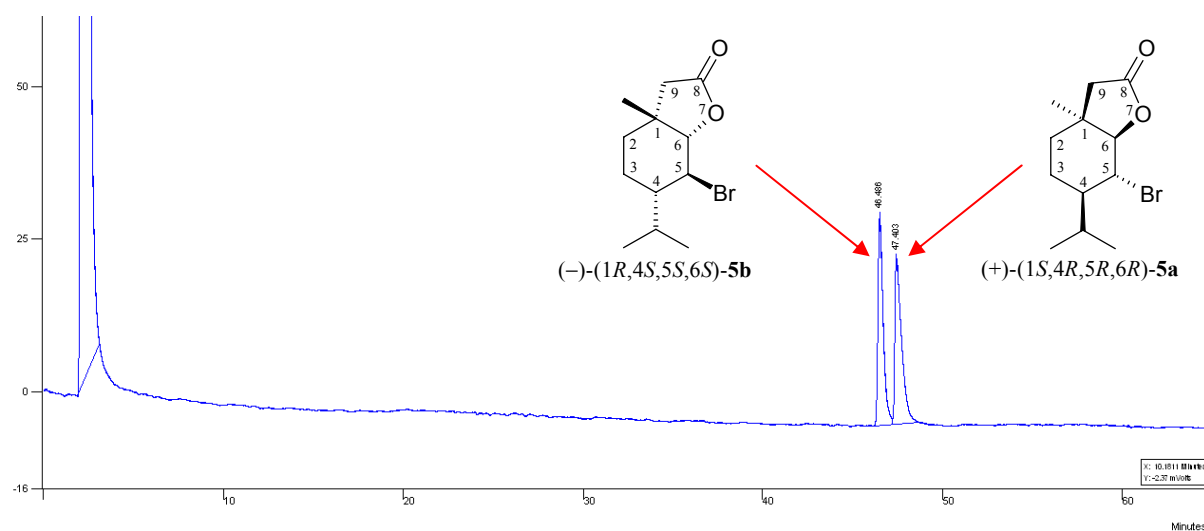

Fig. 42. CGC chromatogram of (±)-5c.

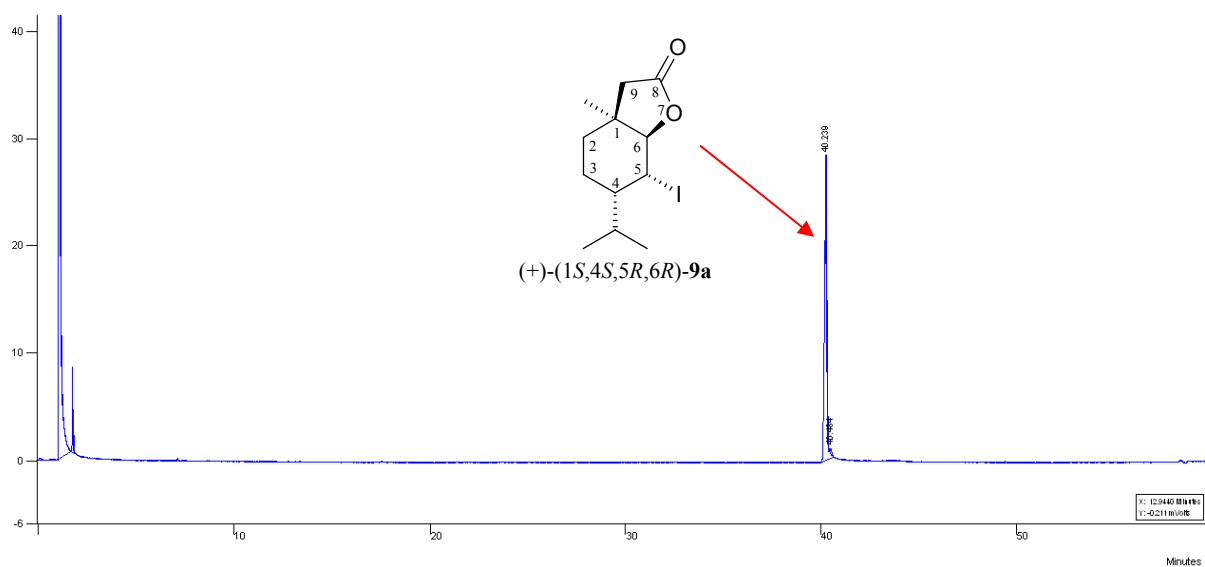

Fig. 43. CGC chromatogram of (+)-**9a** (ee = 98%).

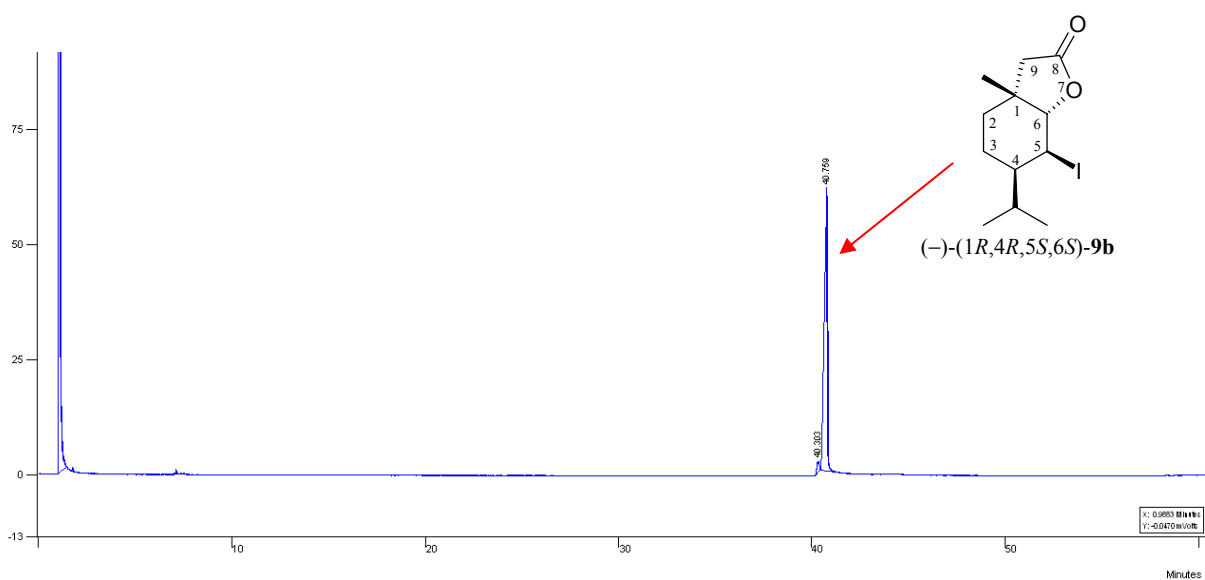

Fig. 44. CGC chromatogram of (-)-**9b** (ee = 94%).

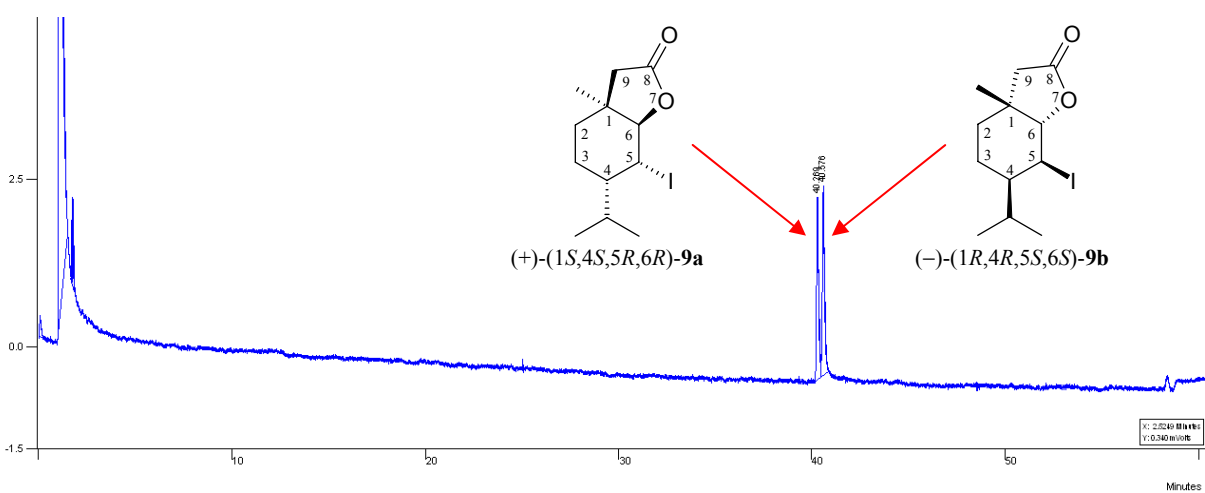

Fig. 45. CGC chromatogram of (±)-**9c**.

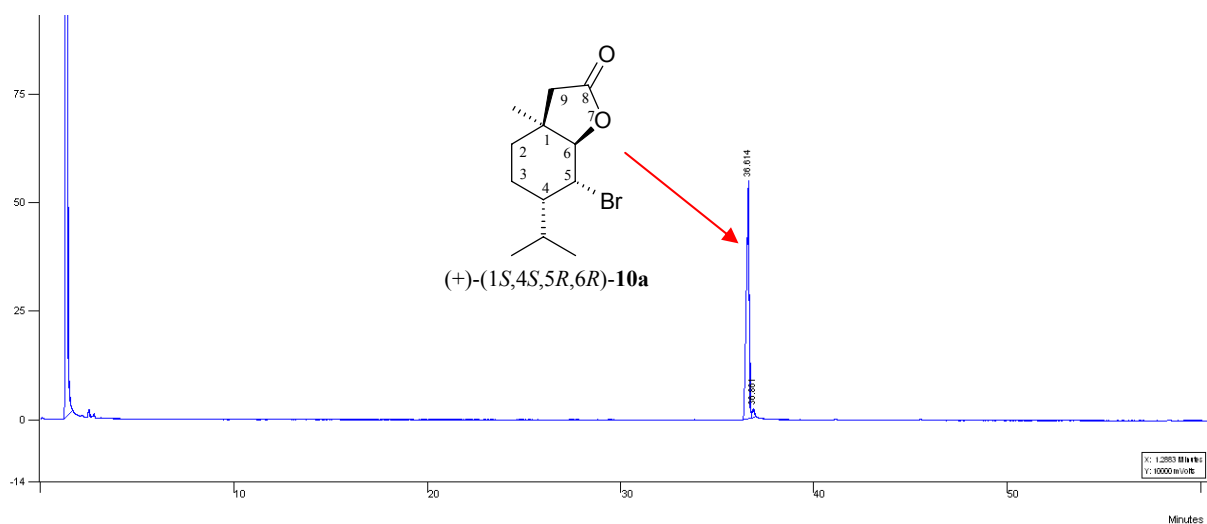

Fig. 46. CGC chromatogram of (+)-10a (ee = 94%).

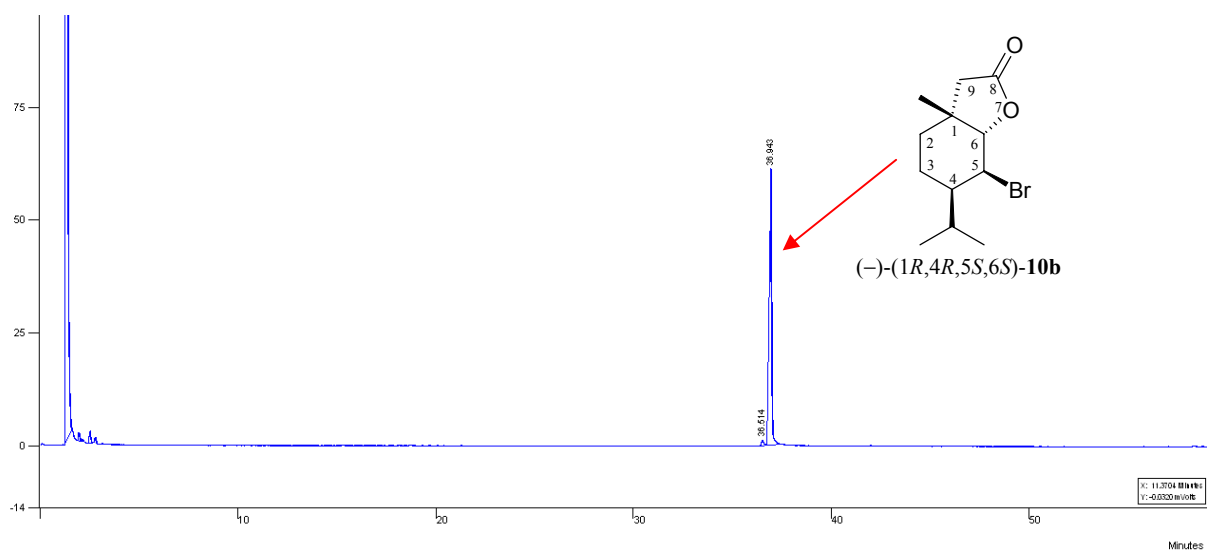

Fig. 47. CGC chromatogram of (-)-10b (ee = 96%).

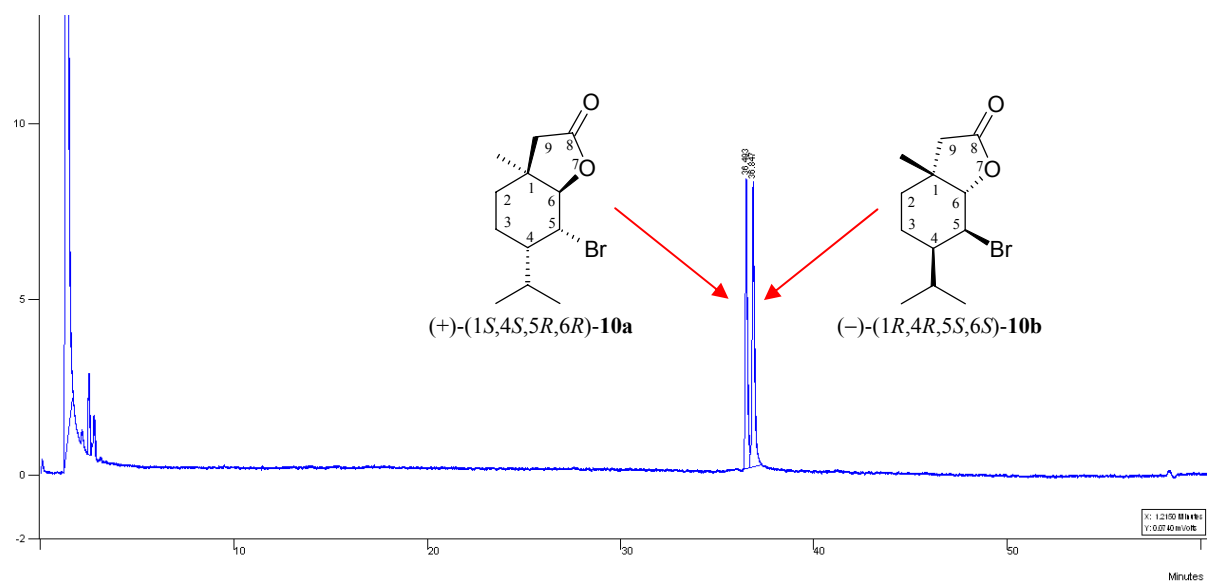

Fig. 48. CGC chromatogram of (±)-10c.

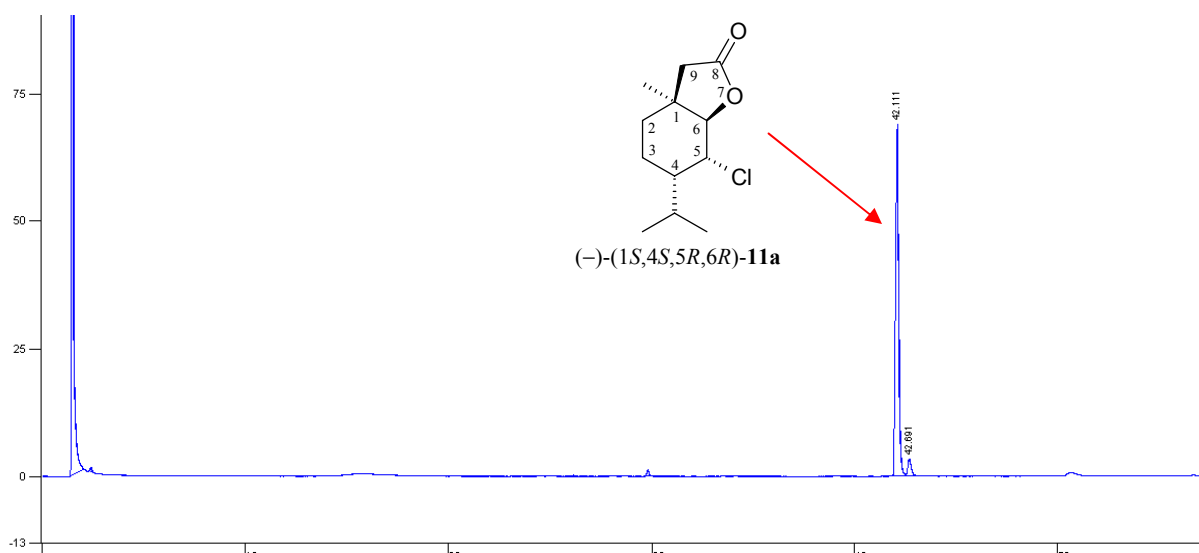

**Fig. 49.** CGC chromatogram of (-)-11a (ee = 91%).

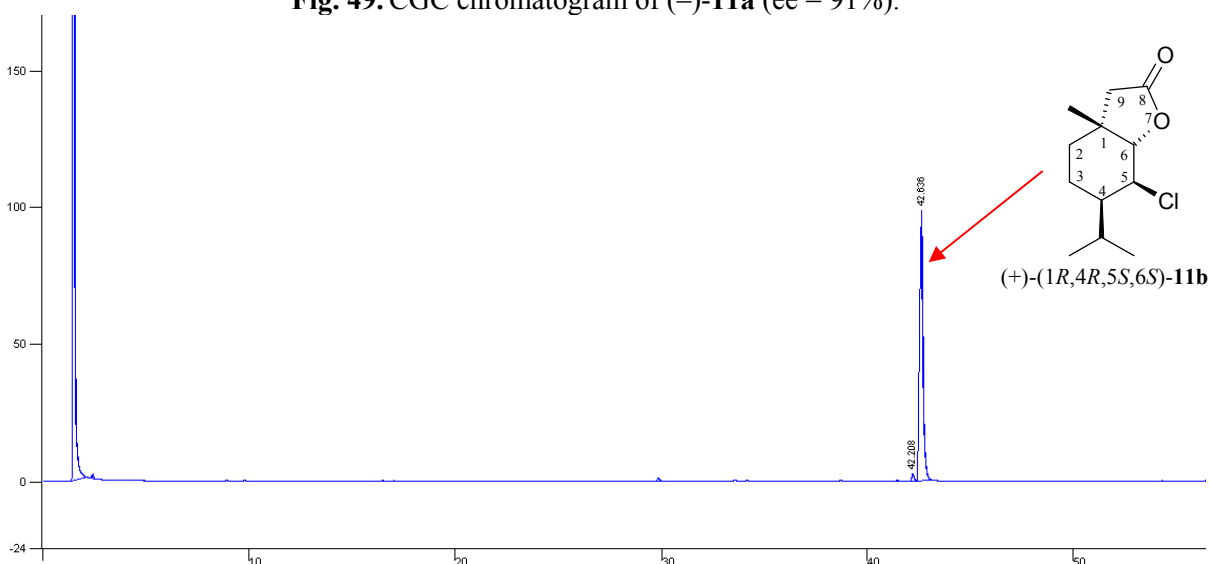

**Fig. 50.** CGC chromatogram of (+)-11b (ee = 96%).

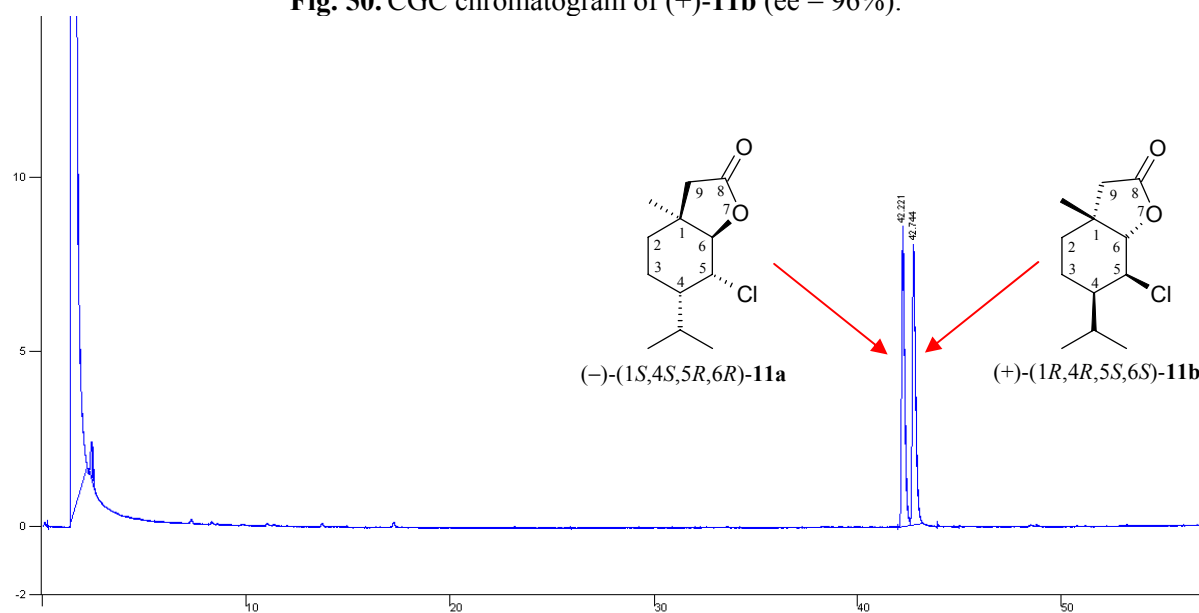

**Fig. 51.** CGC chromatogram of (±)-11c.
